# Early neurulation recapitulated in assemblies of embryonic and extraembryonic cells

Noémie M. L. P. Bérenger-Currias<sup>1,2</sup>, Maria Mircea<sup>\*1</sup>, Esmée Adegeest<sup>\*1</sup>, Patrick R. van den Berg<sup>1</sup>, Marleen Feliksik<sup>1</sup>, Mazène Hochane<sup>#,1</sup>, Timon Idema<sup>#,2</sup>, Sander J. Tans<sup>#,2,3</sup>, Stefan Semrau<sup>#,1</sup>

\* equal contribution

# co-corresponding authors

1. Leiden University, Einsteinweg 55, 2333 CC Leiden, Netherlands

2. Delft University of Technology, Department of Bionanoscience, Kavli Institute of Nanoscience, Van der Maasweg 9, 2629 HZ Delft, Netherlands

3. AMOLF, Science Park 104, 1098 XG Amsterdam, Netherlands

1 **Recapitulating mammalian embryonic development *in vitro* is a major challenge in**  
2 **biology. It has been shown that gastruloids<sup>1-5</sup> and ETX embryos<sup>6</sup> can display hallmarks**  
3 **of gastrulation *in vitro*. However, these models fail to progress beyond spatially**  
4 **segregated, yet amorphous cellular assemblies. Systems such as organoids<sup>7</sup> do show tissue**  
5 **stratification and organogenesis, but require adult stem cells or exogenous induction of**  
6 **specific cell fates, and hence do not reflect the emergent organization of embryonic**  
7 **development. Notably, gastruloids are derived exclusively from embryonic stem cells**  
8 **(ESCs), whereas, *in vivo*, crucial patterning cues are provided by extraembryonic cells<sup>8</sup>.**  
9 **Here, we show that assemblies of mouse ESCs (mESCs) and extraembryonic endoderm**  
10 **(XEN) cells can develop beyond gastrulation and produce a central hallmark of**  
11 **organogenesis: stratified neural epithelia resembling a neural tube, which can be further**  
12 **differentiated to cerebral cortex-like tissue. By single-cell RNA-seq, we show that our**

13 **model has a larger cell type diversity than existing models, and that mESCs and XEN**  
14 **cells impact each other's differentiation. XEN cells promote neural tube formation**  
15 **through local inhibition of primitive streak formation. In turn, the presence of mESCs**  
16 **drives XEN cells to resemble visceral endoderm, which envelops the embryo *in vivo*. This**  
17 **study provides a model system to investigate neurulation and extraembryonic endoderm**  
18 **development, and may serve as a starting point to generate embryo models that advance**  
19 **further toward the formation of the vasculature, nervous system, and digestive tube.**

20

21 We first implemented the original mouse gastruloid protocol<sup>1</sup> in which mESCs are aggregated  
22 in N2B27 media and exposed to a pulse of WNT signaling for 24 h. After 96 h, this protocol  
23 resulted in elongated gastruloids. As reported before<sup>1-3</sup>, gastruloids contained localized  
24 primitive streak- and neural progenitor-like compartments, marked by Brachyury (T) and  
25 SOX2, respectively (Fig. 1b, inset). We then adapted the gastruloid protocol by co-aggregating  
26 XEN cells with mESCs, keeping all other conditions the same (Fig. 1a). After 96 h, the  
27 resulting aggregates again showed T-positive and SOX2 positive compartments (Fig. 1b).  
28 However, in striking contrast with standard gastruloids, SOX2-positive cells were now  
29 organized in stratified epithelia surrounding one or multiple lumina. The frequency of these  
30 tubular structures depended on the fraction of XEN cells (Fig. 1c, Extended Data Fig. 1a). At  
31 a XEN:mESC ratio of 1:3 we observed the concurrence of SOX2-positive tubes and T-positive  
32 cells in the majority of aggregates. Since the canonical pluripotency marker OCT4 was not  
33 expressed (Extended Data Fig. 1b), we hypothesized that the observed structures resemble  
34 neural tubes. The presence of N-cadherin and absence of E-cadherin in the tubes (Fig. 1d) is  
35 consistent with the known switch from E- to N-cadherin during neural differentiation *in vivo*<sup>9</sup>  
36 and *in vitro*<sup>10</sup>. Furthermore, we detected the neural progenitor markers PAX6 and NKX6.1<sup>11</sup> in  
37 subpopulations of the SOX2-positive cells (Fig. 1e). Taken together, our results suggested that

38 mESC-XEN aggregates can recapitulate elements of neural induction without relying on  
39 externally applied signals, thereby mimicking embryonic development. Hence, we consider  
40 this model system to be a ‘neuruloid’.

41

42 Next, we wanted to exclude that all mESCs are biased towards the neural fate, as occurs in  
43 existing protocols for induction of neural epithelia<sup>12-14</sup>. To quantify cell type diversity, we  
44 characterized neuruloids and regular gastruloids (without XEN cells), as well as  
45 undifferentiated mESCs and XEN cells, with single-cell RNA-sequencing (scRNA-seq)  
46 (Extended Data Fig. 2a-e). By mapping the data to single-cell transcriptomes of mouse  
47 embryos from E6.5 to E8.5<sup>15</sup> (Extended Data Fig. 2f-i) we classified the transcriptional identity  
48 of the cells (Fig. 2a-c). Except for the least abundant cell types, the distribution of cell types  
49 was consistent across two biological replicates (Extended Data Fig. 2h). Expression of known  
50 markers confirmed the classification by mapping to *in vivo* data (Extended Data Fig. 3,  
51 Supplementary Table 1). Most cell types belonged to the E8.0 or E8.5 embryo (Fig. 2d), which  
52 indicates that *in vitro* differentiation proceeded roughly with the same speed as *in vivo*  
53 development. Most importantly, the cell type distribution in neuruloids was at least as diverse  
54 as in gastruloids. Both model systems contained a variety of mesodermal cell types, such as  
55 paraxial or somitic mesoderm, as well as anterior cell types, such as spinal cord- or brain-like  
56 cells (Fig. 2c). Neuromesodermal progenitors (NMPs) and spinal cord-like cells were the most  
57 abundant in both systems. Neuruloids also contained cell types that were not detected in  
58 gastruloids, such as extraembryonic endoderm cell types, as well as nascent or pharyngeal  
59 mesoderm. Extraembryonic endoderm exclusively differentiated from XEN cells, as evident  
60 from experiments using GFP-expressing XEN cells in neuruloids (Fig. 2e). In summary,  
61 neuruloids have increased cell type diversity compared to gastruloids.

62

63 At the resolution achieved by mapping to the *in vivo* dataset, gastruloids and neuruloids  
64 contained the same neuroectodermal cell types. That did not rule out the possibility of gene  
65 expression differences between neuroectoderm in the two model systems. We used the neural  
66 tube markers *Sox2*, *Pax6* and *Nkx6.1*<sup>11</sup>, detected in the tubular structures (Fig. 1e), to identify  
67 the corresponding cells in the scRNA-seq data. We found these markers to be co-expressed in  
68 cells classified as “spinal cord” in the scRNA-seq data (Fig. 2f, Extended Data Fig. 4a). A large  
69 number of canonical neural tube markers is differentially expressed in those cells (Fig. 2g,  
70 Extended Data Table 1), which further supports their characterization as neural tube-like.  
71 Mapping of the spinal cord-like cluster in neuruloids to *in vivo* spinal cord (Extended Data Fig.  
72 4b) showed that the cells were most similar to dorsal neural progenitors *in vivo*. Differential  
73 gene expression analysis between the spinal cord-like cluster in gastruloids and neuruloids  
74 (Fig. 2h) revealed a higher expression of dorsal markers in neuruloids. Several of these  
75 markers, such as PAX3, MSX1 or ZIC1 are known to be induced by BMP signaling (Extended  
76 Data Table 2), which might be activated by BMP2 originating in XEN-derived cells (Extended  
77 Data Fig. 4c). In summary, tubular structures in neuruloids are composed of cells that have a  
78 neural progenitor-like transcriptional profile. Compared to gastruloids, neuruloids push the  
79 neural progenitors towards a dorsal identity.

80

81 We performed experiments to investigate how strongly the neural tube-like structures resemble  
82 their *in vivo* counterparts. Time-lapse imaging of the neural progenitor marker SOX1 in  
83 developing neuruloids revealed an amorphous SOX1 positive population prior to the formation  
84 of SOX1 positive tubes (Fig. 3a, Supplementary videos 1-3). In gastruloids, by contrast, SOX1  
85 remained restricted to an amorphous subpopulation (Fig. 3a, Supplementary videos 4-6). The  
86 sequence observed in neuruloids mimics *in vivo* mouse development, where SOX1 is first  
87 expressed in the neural plate and persists in the neural tube<sup>16</sup>.

88

89 To explore, how the neural tube-like structures respond to signaling inputs found *in vivo*, we  
90 studied role of the BMP, Hedgehog (Hh) and retinoic acid (RA) pathway (Fig. 3b-c). BMP  
91 signaling has been shown to prevent premature specification of neural fates<sup>17</sup>. Consistently,  
92 BMP inhibition resulted in a higher frequency of neural progenitors (marked by PAX6 and  
93 NKX6.1). Sonic hedgehog, which originates on the ventral side of the developing neural tube  
94 *in vivo*, elicits ventral characteristics in the neural progenitors<sup>18</sup>. As expected, activating the Hh  
95 pathway in our experiments resulted in more cells with ventral characteristics (indicated by the  
96 presence of NKX6.1). RA is involved in anterior-posterior patterning and neurogenesis<sup>19</sup>. In  
97 our *in vitro* model, adding RA strongly increased the number of cells expressing PAX6, which  
98 is found specifically in anterior progenitors<sup>20</sup>. In summary, signaling experiments showed that  
99 neural tube-like structures in neuruloids respond to signaling cues as expected from *in vivo*  
100 development.

101

102 The similarity with neural tubes *in vivo* suggested that the tubular structures might be able to  
103 further differentiate to cerebral tissue. Indeed, when neuruloids were cultured for an additional  
104 4 days in appropriate differentiation media<sup>21</sup>, layered cerebral cortex-like tissues surrounding  
105 cavities, reminiscent of ventricles, could be observed (Fig. 3d, Extended Data Fig. 5a).  
106 Intriguingly, we also observed small clusters of cells positive for the endothelial marker CD31  
107 (Extended Data Fig. 5b), which might indicate early stages of a developing vasculature. Taken  
108 together, immunostaining, time-lapse imaging, signaling and differentiation experiments  
109 revealed properties of neural tubes developing *in vivo*.

110

111 Having characterized the neural tube-like structures, we next focused on the XEN cells, their  
112 differentiation in the neuruloids and their role in inducing the tubes. Strikingly, XEN cells

113 always formed the outermost layer of the neuruloids (Fig. 1b, Extended Data Fig. 1a),  
114 resembling *in vivo* extraembryonic endoderm, which envelops the embryo. Consistently, the  
115 transcriptional profiles of XEN-derived cells in neuruloids mapped to extraembryonic  
116 endoderm (parietal endoderm (PE), and visceral endoderm (VE)) in the *in vivo* data set<sup>15</sup>.  
117 Interestingly, some XEN-derived cells also mapped to gut, reminiscent of the contribution of  
118 VE to the gut *in vivo*<sup>22,23</sup> (Fig. 4a, Extended Data Fig. 6a). By contrast, undifferentiated XEN  
119 cells exclusively mapped to PE, as reported previously<sup>24,25</sup>. Mapping to an (extraembryonic-)  
120 endoderm-focused dataset<sup>23</sup> gave a similar result (Extended Data Fig. 6b-c). Differential gene  
121 expression analysis revealed several PE and VE markers to be more highly expressed in  
122 undifferentiated XEN or differentiated XEN in neuruloids, respectively (Fig. 4b, Extended  
123 Data Table 3). These results suggested that XEN cells differentiate from a PE- to a VE-like  
124 state in neuruloids.

125

126 Since PE and VE have fairly similar gene expression patterns, we wanted to confirm the  
127 differentiation of XEN cells with a more sensitive method. We carried out single-molecule  
128 FISH on the PE marker *Fst*<sup>26</sup>, the VE marker *Spink1*<sup>27</sup> and the pan-extraembryonic endoderm  
129 marker *Dab2*<sup>28</sup> (Fig. 4c). Whereas XEN cells in neuruloids only showed *Dab2* and the VE  
130 marker, undifferentiated XEN cells broadly co-expressed all markers, even when they were  
131 exposed to WNT signaling in the same way as neuruloids. Subpopulations of XEN cells in  
132 neuruloids also expressed E-cadherin, a VE marker<sup>29</sup> (Fig. 4d), whereas the anterior VE marker  
133 *Hhex*<sup>30</sup> was not detected by single-molecule FISH (Extended Data Fig. 6d). These results  
134 suggest that undifferentiated XEN cells have both PE and VE characteristics but become more  
135 VE-like due to the presence of mESCs. Neuruloids thus mimic *in vivo* organization, where VE  
136 is in direct contact with the embryo and PE contributes to the yolk sac.

137

138 Next, we were wondering how XEN cells exert their effect on the co-differentiating mESCs.  
139 Focusing on neuruloids that were only partially covered with XEN cells, we observed that  
140 tubular structures were always adjacent to the XEN cells, while the primitive streak-like  
141 population (T-positive) was on the opposite side (Extended Data Fig. 1a). Notably, we could  
142 observe local suppression of the primitive streak population already prior to tube formation, at  
143 72 h, a time point when gastruloids were still mostly spherically symmetric (Fig. 4e). This  
144 observation suggested that XEN cells guide symmetry breaking by a local effect on adjacent  
145 mESC-derived cells. This effect is reminiscent of the anterior VE *in vivo*, which breaks  
146 anterior-posterior symmetry by local inhibition of WNT signaling.

147

148 *In vivo*, epithelial polarity and stratification depend on the formation of a basement membrane.  
149 We therefore hypothesized that the XEN cells affect the mESCs by forming such a membrane.  
150 XEN cells indeed express the extracellular matrix components laminin and fibronectin in  
151 neuruloids (Extended Data Fig. 7a) and laminin immunostaining showed high signal between  
152 the XEN cells and the tubular structures (Fig. 4f). It has been shown previously, for small  
153 aggregates of mESCs, that the presence of an extracellular matrix can be sufficient for  
154 polarization and lumen formation<sup>12,13,31</sup>. Growing gastruloids in an extracellular matrix gel  
155 (Geltrex) did result in cavities, though no stratified tissues were observed (Extended Data Fig.  
156 7b).

157

158 Since culture in Geltrex was not sufficient to yield neural tube-like structures, we next wanted  
159 to test whether diffusible factors could be responsible. Growing gastruloids in media  
160 conditioned by undifferentiated XEN cells inhibited gastruloid elongation and restricted the  
161 primitive streak-like population to the center of the gastruloids (Fig. 4g). Diffusible factors are  
162 thus likely involved in the effect of the XEN cells. One important class of factors produced by

163 the anterior VE *in vivo* are WNT inhibitors<sup>32</sup>. Since XEN cells were able to induce neural tube-  
164 like structures in the absence of exogenous WNT signal (Extended Data Fig. 7c), they might  
165 either suppress low endogenous WNT activity, or pathways other than WNT also play a role.  
166 All combined, our experiments suggest that XEN cells become VE-like in neuruloids and guide  
167 symmetry-breaking by local inhibition of primitive streak formation. Diffusible factors and the  
168 presence of a basement membrane both appear necessary for the formation of neural tube-like  
169 structures.

170

171 In this study we provide a key next step for *in vitro* models of embryonic development: we  
172 show that assemblies of mESCs and XEN cells can progress beyond gastrulation and robustly  
173 produce neural tube-like structures. Our self-organized neuruloids enable direct *in vitro* study  
174 of mammalian neurulation, and could reveal new mechanisms in extraembryonic endoderm  
175 development. Our observation that XEN cells in neuruloids differentiate due to the presence of  
176 mESCs suggests that the developing epiblast contributes to VE specification *in vivo*. Due to  
177 their high cell type diversity, neuruloids could be the basis for creating more complex models  
178 comprising tissues from several germ layers. The CD31 positive endothelial cells observed  
179 next to cerebral cortex-like tissue might be able to form a vascular network with additional  
180 signaling cues<sup>33</sup>. On a fundamental level, our findings indicate that reciprocal interaction  
181 between co-differentiating cell types can have critical developmental consequences. Adding  
182 XEN, or similar cell types, to existing organoid systems might trigger similar morphogenetic  
183 events as observed here. This might be particularly relevant for organoids that are currently  
184 grown in extracellular matrix gel: in our experiments, XEN cells had a bigger impact on  
185 morphogenesis than extracellular matrix alone. In conclusion, this study established a new *in*  
186 *vitro* model that recapitulates elements of *in vivo* neurulation and demonstrates the  
187 morphogenetic potential of heterotypic cell-cell interactions.



1. van den Brink, S. C. *et al.* Symmetry breaking, germ layer specification and axial organisation in aggregates of mouse embryonic stem cells. *Development* **141**, 4231–4242 (2014).
2. Turner, D. A. *et al.* Anteroposterior polarity and elongation in the absence of extra-embryonic tissues and of spatially localised signalling in gastruloids: mammalian embryonic organoids. *Development* **144**, 3894–3906 (2017).
3. Beccari, L. *et al.* Multi-axial self-organization properties of mouse embryonic stem cells into gastruloids. *Nature* **1** (2018). doi:10.1038/s41586-018-0578-0
4. Warmflash, A., Sorre, B., Etoc, F., Siggia, E. D. & Brivanlou, A. H. A method to recapitulate early embryonic spatial patterning in human embryonic stem cells. *Nature Methods* **11**, 847–854 (2014).
5. Simunovic, M. *et al.* A 3D model of a human epiblast reveals BMP4-driven symmetry breaking. *Nature Cell Biology* **21**, 900–910 (2019).
6. Sozen, B. *et al.* Self-assembly of embryonic and two extra-embryonic stem cell types into gastrulating embryo-like structures. *Nature Cell Biology* **20**, 979–989 (2018).
7. Takebe, T. & Wells, J. M. Organoids by design. *Science* **364**, 956–959 (2019).
8. Tam, P. P. L. & Loebel, D. A. F. Gene function in mouse embryogenesis: get set for gastrulation. *Nature Reviews Genetics* **8**, 368–381 (2007).
9. Hatta, K. & Takeichi, M. Expression of N-cadherin adhesion molecules associated with early morphogenetic events in chick development. *Nature* **320**, 447–449 (1986).
10. Punovuori, K. *et al.* N-cadherin stabilises neural identity by dampening anti-neural signals. *Development* **146**, dev183269 (2019).
11. Jessell, T. M. Neuronal specification in the spinal cord: inductive signals and transcriptional codes. *Nature Reviews Genetics* **1**, 20–29 (2000).

12. Ranga, A. *et al.* Neural tube morphogenesis in synthetic 3D microenvironments. *Proc. Natl. Acad. Sci. U.S.A.* **113**, E6831–E6839 (2016).
13. Meinhardt, A. *et al.* 3D Reconstitution of the Patterned Neural Tube from Embryonic Stem Cells. *Stem Cell Reports* **3**, 987–999 (2014).
14. Haremaki, T. *et al.* Self-organizing neuruloids model developmental aspects of Huntington's disease in the ectodermal compartment. *Nature Biotechnology* **37**, 1198–1208 (2019).
15. Pijuan-Sala, B. *et al.* A single-cell molecular map of mouse gastrulation and early organogenesis. *Nature* **566**, 490–495 (2019).
16. Pevny, L. H., Sockanathan, S., Placzek, M. & Lovell-Badge, R. A role for SOX1 in neural determination. *Development* **125**, 1967–1978 (1998).
17. Di-Gregorio, A. *et al.* BMP signalling inhibits premature neural differentiation in the mouse embryo. *Development* **134**, 3359–3369 (2007).
18. Dessaud, E., McMahon, A. P. & Briscoe, J. Pattern formation in the vertebrate neural tube: a sonic hedgehog morphogen-regulated transcriptional network. *Development* **135**, 2489–2503 (2008).
19. Maden, M. Retinoid signalling in the development of the central nervous system. *Nat. Rev. Neurosci.* **3**, 843–853 (2002).
20. Ericson, J. *et al.* Pax6 controls progenitor cell identity and neuronal fate in response to graded Shh signaling. *Cell* **90**, 169–180 (1997).
21. Lancaster, M. A. *et al.* Cerebral organoids model human brain development and microcephaly. *Nature* **501**, 373–379 (2013).
22. Kwon, G. S., Viotti, M. & Hadjantonakis, A.-K. The endoderm of the mouse embryo arises by dynamic widespread intercalation of embryonic and extraembryonic lineages. *Developmental Cell* **15**, 509–520 (2008).

23. Nowotschin, S. *et al.* The emergent landscape of the mouse gut endoderm at single-cell resolution. *Nature* **569**, 361–367 (2019).
24. Brown, K. *et al.* A comparative analysis of extra-embryonic endoderm cell lines. *PLoS ONE* **5**, e12016 (2010).
25. Kunath, T. *et al.* Imprinted X-inactivation in extra-embryonic endoderm cell lines from mouse blastocysts. *Development* **132**, 1649–1661 (2005).
26. Feijen, A., Goumans, M. J. & van den Eijnden-van Raaij, A. J. Expression of activin subunits, activin receptors and follistatin in postimplantation mouse embryos suggests specific developmental functions for different activins. *Development* **120**, 3621–3637 (1994).
27. Hou, J. *et al.* A systematic screen for genes expressed in definitive endoderm by Serial Analysis of Gene Expression (SAGE). *BMC Developmental Biology* **7**, 92–13 (2007).
28. Yang, D.-H. *et al.* Disabled-2 Is Essential for Endodermal Cell Positioning and Structure Formation during Mouse Embryogenesis. *Developmental biology* **251**, 27–44 (2002).
29. Wang, A. *et al.* Nonmuscle myosin II isoform and domain specificity during early mouse development. *Proc. Natl. Acad. Sci. U.S.A.* **107**, 14645–14650 (2010).
30. Thomas, P. Q., Brown, A. & Beddington, R. S. Hex: a homeobox gene revealing peri-implantation asymmetry in the mouse embryo and an early transient marker of endothelial cell precursors. *Development* **125**, 85–94 (1998).
31. Bedzhov, I. & Zernicka-Goetz, M. Self-Organizing Properties of Mouse Pluripotent Cells Initiate Morphogenesis upon Implantation. *Cell* **156**, 1032–1044 (2014).
32. Kimura-Yoshida, C. *et al.* Canonical Wnt signaling and its antagonist regulate anterior-posterior axis polarization by guiding cell migration in mouse visceral endoderm. *Developmental Cell* **9**, 639–650 (2005).

33. Rossi, L. F., Harris, K. D. & Carandini, M. Excitatory and inhibitory intracortical circuits for orientation and direction selectivity. *bioRxiv* **21**, 556795 (2019).

**Fig. 1 | XEN cells induce neural tube-like structures in gastruloids.** **a**, Schematic of the culture protocol: at 0 h, 200 cells (150 ESCs and 50 XEN cells) were aggregated; CHIR was added between 48 h and 72 h after cell seeding; cell aggregates were cultured until 96 h. **b**, T and SOX2 expression in aggregates at 96 h (z-projection of whole mount immunostaining). Inset: aggregate resulting from the standard gastruloid protocol (without XEN cells). Scale bars 100  $\mu$ m. **c**, Average fraction of aggregates showing tubular structures and T staining at 96 h for different starting ratios of ESCs and XEN cells (n=2 experiments, error bars show standard deviation). **d**, SOX2, E-cadherin and N-cadherin immunostaining in sections of 96 h aggregates. Scale bar 50  $\mu$ m. **e**, T, SOX2, PAX6 and NKX6.1 immunostaining in 96 h aggregates. Scale bars 100  $\mu$ m. **b, d-e**, Cells nuclei were stained with DAPI.

**Fig. 2 | Single-cell RNA-sequencing reveals expression differences between neuruloids and gastruloids.** **a,b**, Umap of cells in neuruloids and gastruloids (2 replicates each) colored by cell type based on mapping to *in vivo* data<sup>15</sup>. **c**, Cell type frequencies in neuruloids and gastruloids. **d**, Developmental age of cell types based on mapping to *in vivo* data. **e**, Umap of cells in neuruloids and gastruloids with spike-in cells and XEN derived cells highlighted by color. **f**, *Sox2*, *Pax6*, *Nkx6.1* and *T* log-expression levels indicated by color in umaps of neuruloids. **g**, Gene expression differences between cells classified as spinal cord and all other cells in neuruloids (fold-change vs p-value). Named genes are expressed in the neural tubes according to previous studies (Extended Data Table 1). **h**, Gene expression differences between cells classified as spinal cord in gastruloids and neuruloids (fold-change vs p-value).

Underlined genes are expressed in the dorsal part of the neural tube according to previous studies (Extended Data Table 2).

**Fig. 3 | Tubular structures show developmental potential resembling neural tubes *in vivo*.**

**a**, Live cell imaging of SOX1 expression in gastruloids (top panel) and neuruloids (lower panel) grown with *Sox1*-GFP mESCs (see Supplementary Videos 1-6). The arrows indicate the formation of two SOX1 positive tubes between 72 h and 91 h (tube 1: white arrows, tube 2 yellow arrows). Scale bars 10  $\mu$ m. **b**, Schematic of the signaling experiments. Neuruloids were treated from 72 h to 96 h, with either BMP pathway inhibitor (BMPi), retinoic acid (RA) or hedgehog pathway agonist (Hh agonist). The neuruloids were then allowed to grow for an additional 48 h before staining. **c**, SOX2, NKX6.1 and PAX6 immunostaining in sections of neuruloids at 144 h, treated with the indicated factors. N = 3 experiments. Scale bars 100  $\mu$ m. **d**, SOX2 and TUJ1 immunostaining in a section of neuruloid-derived cerebral cortex-like tissue, 8 days after cell seeding (differentiated from neuruloids for 4 days). Scale bar 100  $\mu$ m. **c-d**, Cell nuclei are stained with DAPI.

**Fig. 4 | XEN cells guide symmetry breaking by locally inhibiting primitive streak formation.**

**a**, Left, cell types of XEN-derived cells in neuruloids. Cells were classified as gut, parietal endoderm (parietal end.), embryonic VE (visceral end.) or extraembryonic VE (ExE end.). Right, cell types of spiked-in XEN cells. **b**, Gene expression differences between XEN spike-ins and XEN-derived cells in neuruloids (fold-change vs p-value). Orange and pink lines indicate genes with PE-like and VE-like identity, respectively (see Extended Data Table 3). **c**, *Dab2*, *Spink1* and *Fst* expression visualized by single molecule fluorescence *in situ* hybridization (smFISH). Cell nuclei were stained with DAPI. Each diffraction limited dot is a single mRNA molecule. Left, section of a neuruloid at 96 h. Scale bar 50  $\mu$ m. Right, XEN cells

cultured under standard maintenance conditions (top) and XEN cells treated with CHIR according to the neuruloid protocol (bottom). Scale bars 20  $\mu\text{m}$ . **d**, E-cadherin immunostaining in sections of neuruloids at 96 h. XEN cells were localized by expression of GATA6. Zoom-ins are outlined by dashed boxes 1-3 and shown on the right. **e**, T and SOX2 expression in neuruloids (left) and gastruloids (right) at 72 h (z-projection of whole mount immunostaining). XEN cells were localized by expression of DAB2 and are indicated by a dashed outline. **f**, SOX2 and laminin immunostaining in sections of neuruloids at 96 h. XEN cells were localized by expression of GATA6. A zoom-in is outlined by a dashed box and shown on the right. **g**, T and SOX2 expression in gastruloids grown in XEN-conditioned media at 96 h (z-projection of whole mount immunostaining). **d-g**, Cell nuclei were stained with DAPI. Scale bars 50  $\mu\text{m}$ .

## Methods

### 188 Experimental methods

#### 189 Cell culture

190 All cell lines were routinely cultured in KO DMEM medium (Gibco) supplemented with 10%  
191 ES certified FBS (Gibco), 0.1 mM 2-Mercaptoethanol (Sigma-Aldrich),  $1 \times 100$  U/mL  
192 penicillin/streptomycin, 1x MEM Non-Essential Amino Acids (Gibco), 2 mM L-glutamine  
193 (Gibco), 1000 U/mL mouse LIF (ESGRO). Cells were passaged every other day and replated  
194 in tissue-culture treated dishes coated with gelatin. E14 mouse ES cells were provided by  
195 Alexander van Oudenaarden. The *Sox1<sup>GFPiresPac</sup>* mouse ES cell line was created by Mario  
196 Stavridis and Meng Li in the group of Austin Smith<sup>34</sup> and provided by Sally Lowell. XEN and  
197 XEN-*eGFP* were provided by Christian Schröter<sup>25</sup>. All cell lines were regularly tested for  
198 mycoplasma infection. The ES-mCherry-GPI cell line was obtained by introducing a mCherry-

199 GPI transgene in the *Pdgfra*<sup>H2B-GFP</sup> cell line, provided by the group of Anna-Katerina  
200 Hadjantonakis<sup>35</sup>.

201

## 202 **Differentiation**

### 203 **Gastruloids**

204 The gastruloid differentiation protocol was adapted from van den Brink et al.<sup>1</sup>. ES cells were  
205 collected from tissue-culture treated dishes by trypsinization, gentle trituration with a pipet and  
206 centrifugation (1200 r.p.m., 3 min). After collection, cells were resuspended in 2 mL of freshly  
207 prepared, prewarmed N2B27 medium: DMEM/F12 (Life technologies) supplemented with 0.5  
208 × N2 supplement (Gibco), 0.5 × B27 supplement (Gibco), 0.5 mM L-glutamine (Gibco),  
209 1 × 100 U/mL penicillin/streptomycin (Gibco), 0.5 × MEM Non-Essential Amino Acids  
210 (Gibco), 0.1 mM 2-Mercaptoethanol (Sigma-Aldrich). Cells were counted to determine the cell  
211 concentration. For gastruloids, 200 ES cells were seeded in 40 µL of N2B27 in each well of a  
212 round-bottom low-adherence 96-well plate. 48 h after seeding, 150 µL of prewarmed N2B27  
213 supplemented with 3 µM of GSK3 inhibitor (CHIR99021, Axon Medchem) was added to each  
214 well. 72 h after seeding, 150 µL of medium was removed from each well and replaced by 150  
215 µL of preheated N2B27. Gastruloids were collected at 96 h after seeding and fixed with 4%  
216 paraformaldehyde (PFA, Alfa Aesar) overnight at 4 °C.

217 For the experiments with gastruloids grown in Geltrex, cell aggregates were collected at 24 h,  
218 48 h and 72 h and embedded into LDEV-Free, hESC-Qualified, reduced growth factor Geltrex  
219 (Gibco) in culture dishes for the rest of the procedure. Only the gastruloids transferred at 72 h  
220 showed robust growth. At 96 h, culture dishes were covered with ice-cold PBS and placed on  
221 a shaker at 4 °C for 10 min. Gastruloids were gently collected by pipetting and washed three  
222 times by centrifugation in ice-cold PBS to remove the gel, then fixed with 4% PFA overnight  
223 at 4 °C.

## 224 **Neuruloids**

225 ES and XEN cells were collected from tissue-culture treated dishes by trypsinization, gentle  
226 trituration with a pipet and centrifugation (1200 r.p.m., 3 min). After collection, cells were  
227 resuspended in 2 mL of fresh and prewarmed N2B27 medium. Cells were counted to determine  
228 cell concentration. For neuruloids, several ratios of XEN and ES cells were tested (1:1, 1:2,  
229 1:3, 1:4, 1:5) and compared with the regular gastruloid condition (0:1). The total number of  
230 cells was fixed at 200. Over two separate experiments, the proportion of organoids showing T  
231 staining and tubular structures was quantified (total number of embryonic organoids 1:1=179,  
232 1:2=143, 1:3=143, 1:4=140, 0:1=130) and the optimal ratio was determined to be 1:3 (see Fig.  
233 1c and Extended Data Fig. 1a). A total of 200 cells (150 ES cells and 50 XEN cells) was seeded  
234 in 40  $\mu$ L of N2B27 in each well of a round-bottom low-adherence 96-well plate. 48 h after  
235 seeding, 150  $\mu$ L of prewarmed N2B27 supplemented with 3  $\mu$ M of GSK3 inhibitor  
236 (CHIR99021, Axon Medchem) was added to each well. 72 h after seeding, 150  $\mu$ L of medium  
237 was removed from each well and replaced by 150  $\mu$ L of prewarmed N2B27. Neuruloids were  
238 collected at 96 h after seeding and fixed with 4% PFA overnight at 4 °C.

239 For the experiment of neuruloids grown without GSK3 inhibitor, cells were seeded as usual.  
240 At 48 h, 150  $\mu$ L of preheated N2B27 was added to each well. At 72 h, 150  $\mu$ L of medium was  
241 removed from each well and replaced by 150  $\mu$ L of prewarmed N2B27. Neuruloids were  
242 collected at 96 h after seeding.

243 For the smFISH control experiments, XEN cells were seeded at low density in N2B27 medium.  
244 At 48 h the medium was replaced by prewarmed N2B27 supplemented with 3  $\mu$ M of GSK3  
245 inhibitor. 72 h after seeding, the medium was replaced with prewarmed N2B27. Cells were  
246 fixed at 96 h with 4% PFA for 1 h at 4 °C.

247

248



## 249 **Cerebral cortex differentiation**

250 Cerebral cortex-like tissue was created according to a protocol adapted from Lancaster et al.,<sup>21</sup>.  
251 Instead of collecting neuruloids at 96 h, the medium was replaced by cerebral organoid  
252 differentiation medium: DMEM-F12 (Life technologies), Neurobasal (Gibco), 0.5 × B27  
253 supplement containing vitamin A (Gibco), 0.5 × N2 supplement (Gibco), 2.5 μM/mL Insulin,  
254 2mM L-glutamine (Gibco), 0.5 × MEM-Non-Essential Amino Acids (Gibco), 1 × 100 U/mL  
255 penicillin-streptomycin and 0.05 mM 2-Mercaptoethanol (Sigma-Aldrich). At 168 h,  
256 aggregates were collected and transferred, with fresh medium, into 10 cm dishes on an orbital  
257 shaker installed in the incubator (85 r.p.m.). Aggregates were grown until 192 h (8 days) during  
258 which medium was refreshed every other day until collection. Collected aggregates were fixed  
259 with 4% PFA for 48 h at 4 °C.

260

## 261 **Signaling experiments**

262 In the signaling experiments with neuruloids, aggregates were treated between 72 h and 96 h  
263 with either LDN193189 (BMPi, 100 nM, Reagents Direct), a potent BMP pathway inhibitor,  
264 Purmorphamine (1 μM, STEMCELL Technologies), a small molecule agonist of the hedgehog  
265 pathway, Retinoic acid (RA, 100 nM, Sigma-Aldrich) or DMSO (0.1% final concentration,  
266 Sigma Aldrich) as a vehicle control. For this experiment, the neuruloids were allowed to grow  
267 for an additional 48 h before fixation (144 h total growth) and preparation for staining (see  
268 Immunostaining).

269

## 270 **Immunostaining**

### 271 **Fixation and blocking**

272 After collection, gastruloids and neuruloids were fixed in 4% PFA at 4 °C overnight. Cerebral  
273 cortex-like tissue was fixed under the same conditions, but for 48 h. After fixation, samples

274 were washed three times in washing solution (PBS, 1% bovine serum albumin (BSA)) and  
275 incubated at 4 °C in blocking buffer (PBS, 1% BSA, 0.3% Triton-X-100) for a minimum of 16  
276 h. Samples for smFISH were washed 3 times in PBS after fixation and stored in 70% ethanol  
277 at 4 °C. To stain E14 cells for pluripotency markers, cells in suspension were fixed for 30 min  
278 in 4% PFA at 4 °C, washed three times in washing solution at RT and incubated in blocking  
279 buffer for 1 h at 4 °C.

### 280 **Whole-mount immunolabeling and clearing**

281 Immunolabeling and clearing of gastruloids and neuruloids were based on the protocol  
282 described by Dekkers et al.,<sup>36</sup>. Briefly, after fixation and blocking, samples were incubated  
283 with primary antibodies at 4 °C overnight on a rolling mixer (30 r.p.m.) in organoid washing  
284 buffer (OWB) (PBS, 2% BSA, 0.1% Triton-X-100) supplemented with 0.02% sodium dodecyl  
285 sulfate (SDS), referred to as OWB-SDS. The following primary antibodies were used: rat anti-  
286 SOX2 (1:200, 14-9811-82, Thermo Fisher Scientific), goat anti-T (1:200, sc-17745, Santa Cruz  
287 Biotechnology), goat anti-T (1:100, AF2085, R&D systems), mouse anti-DAB2 (1:100,  
288 610464, BD Biosciences). The next day, samples were washed three times for 2 h in OWB-  
289 SDS at RT, followed by incubation with secondary antibodies (donkey anti-goat Alexa Fluor  
290 488 (1:200, A-11055, Thermo Fisher Scientific), donkey anti-rat Alexa Fluor 488 (1:200, A-  
291 21208, Thermo Fisher Scientific), donkey anti-goat Alexa Fluor 555 (1:200, A-21432, Thermo  
292 Fisher), donkey anti-mouse Alexa Fluor 555 (1:200, A-31570, Thermo Fisher Scientific),  
293 chicken anti-rat Alexa Fluor 647 (1:200, A-21472, Thermo Fisher Scientific)) and 4',6-  
294 diamidino-2-phenylindole (DAPI, 1 µg/mL, Merck) in OWB-SDS at 4 °C overnight on a  
295 rolling mixer (30 r.p.m.), protected from light. Finally, samples were washed three times for 2  
296 h in OWB-SDS at RT. Clearing was performed by incubation in fructose-glycerol clearing  
297 solution (60% vol/vol glycerol, 2.5 M fructose) for 20 min at RT. Samples were imaged directly  
298 after clearing or stored at 4 °C in the dark.

## 299 **Cryosectioning and immunolabeling of sections**

300 Prior to cryosectioning, fixed and blocked samples were incubated sequentially in sucrose  
301 solutions (10, 20 and 30%) for 30 min (gastruloids and neuruloids) or 2 h (cerebral organoids)  
302 at 27 °C, and embedded in optimal cutting temperature (OCT) compound. Samples in OCT  
303 were placed on dry ice for rapid freezing, and stored at -80 °C prior to cryosectioning. Samples  
304 were cut to cryosections (10 µm thickness) using a cryostat (Thermo Fisher Scientific, USA)  
305 and cryosections were placed on poly-L-lysine coated glass slides (Merck). The slides were  
306 stored directly at -80 °C. For immunofluorescence staining, slides were thawed and rinsed with  
307 PBS for 10 min at RT to dissolve the OCT. Subsequently, slides were incubated overnight at 4  
308 °C with the following primary antibodies diluted in blocking buffer: rat anti-SOX2 (1:200, 14-  
309 9811-82, Thermo Fisher Scientific), goat anti-T (1:200, sc-17745, Santa Cruz Biotechnology),  
310 mouse anti-N-cadherin (1:200, 33-3900, Thermo Fisher Scientific), rabbit anti-E-cadherin  
311 (1:200, 3195, Cell Signaling Technology), rabbit anti-PAX6 (1:100 (cerebral organoids) or  
312 1:200 (gastruloids, neuruloids), 42-6600, Thermo Fisher Scientific), mouse anti-NKX6.1  
313 (1:200, F55A12, Developmental Studies Hybridoma Bank), rabbit anti-NKX6.1 (1:200,  
314 HPA036774, Merck), mouse anti-TUJ1 (1:200, 801202, BioLegend), rabbit anti-CD31 (1:50,  
315 ab28364, Abcam), rabbit anti-GATA6 (1:200, PA1-104, Thermo Fisher Scientific), goat anti-  
316 GATA6 (1:200, AF1700, R&D Systems), rabbit anti-Laminin (1:200, PA1-16730, Thermo  
317 Fisher Scientific), mouse anti-OCT4 (1:200, MA1-104, Thermo Fisher Scientific). The next  
318 day, the slides were washed twice for 10 min in PBS at RT. Subsequently, the slides were  
319 incubated with secondary antibodies (donkey anti-goat Alexa Fluor 488 (1:200, A-11055,  
320 Thermo Fisher Scientific), donkey anti-rat Alexa Fluor 488 (1:200, A-21208, Thermo Fisher  
321 Scientific), donkey anti-goat Alexa Fluor 555 (1:200, A-21432, Thermo Fisher), donkey anti-  
322 mouse Alexa Fluor 555 (1:200, A-31570, Thermo Fisher Scientific), chicken anti-rat Alexa  
323 Fluor 647 (1:200, A-21472, Thermo Fisher Scientific), donkey anti-rabbit Alexa Fluor 647

324 (1:200, A-31573, Thermo Fisher Scientific)) and DAPI (1  $\mu\text{g}/\text{mL}$ , Merck) in blocking buffer  
325 for 4 h at 4 °C, and washed three times for 10 min at RT. Slides were mounted in ProLong™  
326 Gold Antifade Mountant (Thermo Fisher Scientific) and imaged after 24-48 h.

### 327 **Immunolabeling of E14 cells**

328 After fixation and blocking, E14 cells were incubated with the following primary antibodies in  
329 blocking buffer overnight at 4 °C: rat anti-SOX2 (1:200, 14-9811-82, Thermo Fisher  
330 Scientific) and mouse anti-OCT4 (1:200, MA1-104, Thermo Fisher Scientific). The next day,  
331 cells were washed three times in washing solution for 5 min at RT and incubated with  
332 secondary antibodies (donkey anti-rat Alexa Fluor 488 (1:200, A-21208, Thermo Fisher  
333 Scientific) and donkey anti-mouse Alexa Fluor 555 (1:200, A-31570, Thermo Fisher  
334 Scientific)) and DAPI (1  $\mu\text{g}/\text{mL}$ , Merck) in blocking buffer for 3 h at 4 °C. Finally, the cells  
335 were washed three times in washing solution for 5 min at RT and imaged directly.

336

### 337 **Single-molecule fluorescence in-situ hybridization (smFISH)**

338 smFISH was performed as described previously<sup>37</sup>. Briefly, samples were fixed with PFA and  
339 stored in 70% ethanol, as described above. Custom designed smFISH probes for *Dab2*, *Fst*,  
340 *Hhex* and *Spink1* (BioCat, Supplementary Table 2), labeled with Quasar 570, CAL Fluor Red  
341 610, or Quasar 670, were incubated with the samples overnight at 30 °C in hybridization buffer  
342 (100 mg/mL dextran sulfate, 25% formamide, 2X SSC, 1 mg/mL E.coli tRNA, 1 mM vanadyl  
343 ribonucleoside complex, 0.25 mg/mL BSA; Thermo Fisher Scientific). Samples were washed  
344 twice for 30 min at 30 °C with wash buffer (25% formamide, 2X SSC). The wash buffer was  
345 supplemented with DAPI (1  $\mu\text{g}/\text{mL}$ ) in the second wash step. All solutions were prepared with  
346 RNase-free water. Finally, the samples were mounted in ProlongGold (Life Technologies) and  
347 imaged when hardened (sections) or immediately (ibidi dishes). All components are from  
348 Sigma-Aldrich unless indicated.

349

## 350 **Imaging**

351 Fixed and stained samples were imaged on a Nikon Ti-Eclipse epifluorescence microscope  
352 equipped with an Andor iXON Ultra 888 EMCCD camera and dedicated, custom-made  
353 fluorescence filter sets (Nikon). Primarily, a 10× / 0.3 Plan Fluor DLL objective, a 20× / 0.5  
354 Plan Fluor DLL objective, or a 40× / 1.3 Super Fluor oil-immersion objective (Nikon) were  
355 used. To image complete sections of cerebral organoids, multiple adjacent fields of view were  
356 acquired and combined using the tiling feature of the NIS Elements software (Nikon). Z-stacks  
357 were collected of whole-mount gastruloids and neuruloids with distances of 10 μm between  
358 planes. For smFISH measurements, z-stacks were collected with a distance of 0.2 μm between  
359 planes in four fluorescence channels (DAPI, Quasar 570, CAL Fluor Red 610, Quasar  
360 670) using a 100× /1.45 Plan Apo Lambda oil (Nikon) objective.  
361 To track SOX1 expression in gastruloids and neuruloids during the 24 h growth after the GSK3  
362 inhibitor pulse, 72 h gastruloids and neuruloids grown from the *Sox1*<sup>GFPiresPac</sup> ES cell line were  
363 transferred to a glass-bottom μ-Slide imaging chamber (ibidi) and imaged every 40 min for 24  
364 h, while temperature and CO<sub>2</sub> levels were maintained at 37 °C and 5%, respectively, by a stage  
365 top incubator (INUG2-TIZW-SET, Tokai Hit) mounted on the Nikon Ti-Eclipse  
366 epifluorescence microscope.

367

## 368 **Single-cell RNA-seq library preparation and sequencing**

369 For each replicate, 96 pooled gastruloids and 96 pooled neuruloids were collected from a  
370 round-bottomed low-adherence 96-well plate in 15 mL Falcon tubes and pelleted by gentle  
371 centrifugation (500 r.p.m. for 2 min). No final aggregate was excluded from the collection.  
372 After washing with cold PBS, samples were resuspended in N2B27. Cells were then  
373 dissociated by 5 min incubation in TrypLE (Gibco) and gentle trituration with a pipet,

374 centrifuged and resuspended in 1 mL of cold N2B27. Cells were counted to determine cell  
375 number and viability. For the first replicate, ES-mCherry-GPI were spiked in at a frequency of  
376 5%. For the second replicate, E14 cells were collected from culture dishes and incubated for  
377 30 min at 4 °C with CITE-seq cell hashing<sup>38</sup> antibody Ab\_CD15 (1:200) (Biolegend). XEN-  
378 *eGFP* were collected from culture plates and incubated for 30 min at 4 °C with CITE-seq cell  
379 hashing antibody Ab\_CD140 (1:200) (Biolegend). In the gastruloid sample, labeled E14 cells  
380 were spiked in at a frequency of 5%, whereas in the neuruloid sample labeled E14 and XEN-  
381 *eGFP* were spiked in, both at a frequency of 5%. High viability of the cells in all samples was  
382 confirmed before 10X library preparation. Single-cell RNA-seq libraries were prepared using  
383 the Chromium Single Cell 3' Reagent Kit, Version 3 Chemistry (10x Genomics) according to  
384 the manufacturer's protocol. CITE-seq libraries were prepared according to the CITE-seq  
385 protocol from New York Genome Center version 2019-02-13. Libraries were sequenced paired  
386 end on an Illumina Novaseq6000 at 150 base pairs.

387

## 388 **Computational methods**

### 389 **Analysis of single-cell RNA-sequencing data**

#### 390 **Single-cell RNA-seq data pruning and normalization**

391 Cells with a low number of transcripts were excluded from further analysis based on the  
392 histograms in Extended Data Fig. 2a (count < 1300 for replicate 1 of the neuruloid experiment  
393 and count < 2300 for the other datasets). Genes expressed in less than 2 cells (across merged  
394 replicates) were excluded from further analysis. The final neuruloid dataset contains 14286  
395 genes and 4591 or 6857 cells for replicate 1 or 2, respectively. The gastruloid dataset contains  
396 14384 genes and 4233 or 8363 cells per replicate. The two datasets were normalized using the  
397 scran R-package (V 1.10.2<sup>39</sup>). Gene variabilities were calculated (improvedCV2, scran) for  
398 each replicate separately, after excluding ribosomal genes [Ribosomal Protein Gene Database,

399 <http://ribosome.med.miyazaki-u.ac.jp/>], exogenously expressed genes and genes expressing  
400 the antibodies used for CITE-seq. The 10% most highly variable genes (HVG) were selected  
401 based on variability p-values.

#### 402 **Dimensionality reduction**

403 For each of the two datasets, the two replicates were batch corrected with the fast mutual  
404 nearest neighbors (MNN) method implemented in the scran R-package<sup>40</sup>, using the union of  
405 the 10% HVG of the two replicates and log-transformed normalized counts with  $d = 120$   
406 (number of principal components) and  $k = 50$  (number of nearest neighbours). For  
407 dimensionality reduction, a uniform manifold approximation and projection (umap) was  
408 calculated on the batch corrected data using the R-package umap (V 0.2.3.1<sup>41</sup>) with  $n = 50$ ,  
409  $\text{min\_dist} = 0.7$  and using the cosine distance measure.

#### 410 **Identification of spike-in cells**

411 Cells with any expression of mCherry were annotated as ES (mCherry+). The remaining spike-  
412 in cells, E14 (CD15+) and XEN spike-in (CD140+) (see Single-cell RNA-seq library  
413 preparation and sequencing), could not be determined by the expression level of the antibody  
414 alone. We therefore chose to assign spike-ins based on clusters. For each of the two datasets, a  
415 shared nearest neighbor graph was constructed from the batch corrected data (see  
416 Dimensionality reduction) with scran using  $k = 20$  and  $d = 30$ . Louvain clustering was  
417 performed on the constructed graphs with the R-package igraph (V1.2.4.1<sup>42</sup>), which resulted in  
418 8 clusters for neuruloids and 7 clusters for gastruloids (see Extended Data Fig. 2c). We  
419 identified 3 out of the 8 clusters in neuruloids based on literature markers and spike-in gene  
420 expression. One cluster out of these three was mainly comprised of mESCs, due to high  
421 Ab\_CD15 expression and mCherry positive cells. Cells that had an expression of  $\text{Ab\_CD15} >$   
422 50 and were part of this cluster were considered spiked-in E14 and annotated as E14 (CD15+).  
423 The other two clusters were both eGFP positive, where one of them had a higher Ab\_CD140

424 expression and was thus annotated as XEN spike-in (Ab\_CD140+). The second cluster was  
425 annotated as XEN derived (Ab\_CD140-). Similarly, for gastruloids, one of the 7 clusters was  
426 comprised of mainly mESCs based on literature markers and spike-in gene expression. Cells  
427 that had an expression of Ab\_CD15 > 100 and were part of this cluster were considered spiked-  
428 in E14 and annotated as E14 (CD15+).

#### 429 **Analysis of cell cycle and stress-related genes**

430 For each of the two datasets, cell cycle analysis was performed with the scran package using  
431 the cyclone function<sup>43</sup> on the normalized counts. Cells in G2M phase were distributed evenly  
432 across all clusters and thus the clustering was not biased by cell cycle. No other separate cluster  
433 that consisted entirely of cell cycle related cells appeared.

434 For the analysis of stress-related genes, a list of known stress genes<sup>44</sup> was used to calculate the  
435 average standardized expression per cell based on normalized counts. Stress-related genes were  
436 mainly found within the spike-in cells and there was no other separate cluster that consisted  
437 entirely of highly stressed cells.

#### 438 **Mapping to *in vivo* datasets**

439 Our datasets were mapped to three different *in vivo* datasets.

##### 440 *Pijuan-Sala et al. dataset*

441 The Pijuan-Sala et al. dataset<sup>15</sup>, which was downloaded from  
442 [https://content.cruk.cam.ac.uk/jmlab/atlas\\_data.tar.gz](https://content.cruk.cam.ac.uk/jmlab/atlas_data.tar.gz), consists of 9 timepoints from E6.5 to  
443 E8.5. The data was normalized by size factors provided by the authors. Cells with no cell type  
444 assignment were excluded from further analysis. The 10% HVG were calculated  
445 (improvedCV2, scran package) on the remaining cells excluding sex genes, similar to Pijuan-  
446 Sala et al.'s method. Cells in the "mixed\_gastrulation" cluster were also excluded. MNN  
447 mapping was applied to log-transformed normalized counts of the 10% HVG. First, *in vivo*  
448 timepoints were mapped to each other in decreasing order. Then, each of our four datasets was



449 mapped separately to the combined Pijuan-Sala et al. dataset (MNN method with  $d = 120$ ,  $k =$   
450  $50$ ). K-nearest-neighbor (knn) assignment was performed in the batch corrected principal  
451 component space. For each cell in our datasets, the 50 nearest neighbors in the *in vivo* dataset,  
452 based on Euclidean distances, were calculated. Each cell was assigned the most abundant cell  
453 type within the knn, if certain distance and confidence score conditions were met. This  
454 confidence score was calculated for each cell as the number of the most abundant cell type  
455 divided by the total number of neighbors ( $k=50$ ). A cell was annotated as “Not assigned” if  
456 either, the average distance to its nearest neighbor exceeded a certain threshold (determined by  
457 the long tail of the histogram of average distances for each of our datasets separately) or the  
458 assignment had a confidence score less than 0.5. Additionally, we placed cells in “Not  
459 assigned” if they were assigned to clusters with less than 10 cells, or to the cluster “Blood  
460 progenitors 2” (because this cluster did not show distinct expression of known literature  
461 markers). This resulted in 22 assigned clusters for neuruloids and 15 assigned clusters for  
462 gastruloids. For each cell in our dataset we calculated the average and the standard deviation  
463 of the developmental age of the knn.

#### 464 *Nowotschin et al. dataset*

465 The Nowotschin et al. dataset<sup>23</sup>, which was downloaded from <https://endoderm-explorer.com/>,  
466 consists of 6 timepoints from E3.5 to E8.75. The data was normalized (scran) and the 10%  
467 HVG were calculated (improvedCV2, scran package). First, MNN was applied to the  
468 Nowotschin et al. dataset in increasing order of the timepoints (using log-transformed  
469 normalized counts of the 10% HVG,  $d = 150$ ,  $k = 50$ ). Then, XEN cells from our neuruloid  
470 dataset (XEN spike-ins (CD140+) and XEN derived (CD140-)) were mapped to the MNN-  
471 corrected Nowotschin et al. dataset. Knn assignment was performed as described above and  
472 resulted in 7 assigned clusters.

#### 473 *Delile et al. dataset*

474 The Delile et al. dataset<sup>45</sup>, which was downloaded from  
475 <https://github.com/juliendelile/MouseSpinalCordAtlas>, consists of 5 timepoints from E9.5 to  
476 E13.5. Cells that had a cell type assignment of “Null” or “Outlier” were excluded from further  
477 analysis. The data was normalized (scran) and the 10% HVG were calculated. First, MNN was  
478 applied to the Delile et al. dataset in order of increasing timepoints (log-transformed  
479 normalized counts of the 10% HVG,  $d = 120$ ,  $k = 50$ ). Then, we mapped neural-like cells (Cells  
480 annotated as “Neural crest”, “NMP”, “Forebrain/Midbrain/Hindbrain”, “Rostral  
481 neuroectoderm”, “Caudal neuroectoderm” and “Spinal cord”, without applying a cutoff for  
482 distance and confidence score.) to the MNN corrected Delile et al. dataset separately for each  
483 of our replicates. Knn assignment was performed as described above and resulted in 3 clusters  
484 for neuruloids and 3 clusters for gastruloids.

#### 485 **Differential expression analysis**

486 For the differential expression test between “spike-in XENs” and “XENs in neuruloids” a  
487 Welch t-test (implemented in findMarkers, scran R package) was conducted on the normalized  
488 log-transformed counts. The test was performed on neuruloids from replicate 2. “spike-in  
489 XENs” were chosen as the 100 cells with highest Ab\_CD140 expression and “XENs in  
490 neuruloids” were the 100 cells with lowest Ab\_CD140 expression within the XEN identified  
491 cells.

492 For the differential expression test between neuruloids and gastruloids, a negative binomial  
493 regression was performed (R package edgeR V 3.24.3<sup>46</sup>). Based on the knn assignment to the  
494 Pijuan-Sala et al. dataset, all cells annotated as “Spinal cord” were extracted from our four  
495 datasets (in neuruloids 859 cells in replicate 1 and 166 cells in replicate 2, in gastruloids 2071  
496 cells in replicate 1 and 1882 cells in replicate 2). Raw counts were used for the regression with  
497 these four subsets as dummy variables and a variable corresponding to the total number of

498 counts per cell. P-values were obtained for the contrast between neuruloids and gastruloids  
499 using the average regression coefficients among variables of both replicates.

500 Similarly, for the differential expression test of the “Spinal cord” in neuruloids, a negative  
501 binomial regression was used. Cells were excluded from the test if either their cell type  
502 occurred in less than 10 cells per replicate, or if the cells were annotated as “Not assigned”,  
503 leaving a total of 13 cell types (7742 cells) to be considered. For each cell type and each  
504 replicate a dummy variable was created and a variable corresponding to the total number of  
505 counts per cell. Then, p-values were obtained for the contrast between the average regression  
506 coefficients of the two replicates of the “Spinal cord” cluster and the average regression  
507 coefficients of all other variables considered in the test.

508 For all differential expression tests p-values were adjusted for multiple hypothesis testing with  
509 the Benjamini-Hochberg method.

510

## 511 **Image analysis**

512 Image stacks of whole-mount immunostained gastruloids and neuruloids, and images of  
513 immunostained sections were pre-processed by background subtraction (rolling ball, radius: 50  
514 pixels = 65  $\mu\text{m}$  (10 $\times$  objective), 32  $\mu\text{m}$  (20 $\times$  objective) or 16  $\mu\text{m}$  (40 $\times$  objective)) in the  
515 channels that showed autofluorescent background using ImageJ <sup>47</sup>. When background  
516 subtraction in images of sections did not result in proper removal of autofluorescent  
517 background signal, the Enhance Local Contrast (CLAHE) tool was used in ImageJ <sup>47</sup>. smFISH  
518 image stacks were pre-processed by applying a Laplacian of a Gaussian filter ( $\sigma = 1$ ) over the  
519 smFISH channels using scikit-image (v0.16.1) <sup>48</sup>. For all image stacks, a maximum projection  
520 was used to obtain a 2D representation. To show a single object per image, images were  
521 cropped around the object of interest.

## Data availability

The single-cell RNA sequencing datasets generated in this study are available in the Gene Expression Omnibus repository, [GSE141530](#).

## Code availability

Custom R and python code used to analyze the data is available from the authors upon request.

34. Ying, Q.-L., Stavridis, M., Griffiths, D., Li, M. & Smith, A. Conversion of embryonic stem cells into neuroectodermal precursors in adherent monoculture. *Nature Biotechnology* **21**, 183–186 (Nature Publishing Group, 2003).
35. Artus, J., Panthier, J.-J. & Hadjantonakis, A.-K. A role for PDGF signaling in expansion of the extra-embryonic endoderm lineage of the mouse blastocyst. *Development* **137**, 3361–3372 (2010).
36. Dekkers, J. F. *et al.* High-resolution 3D imaging of fixed and cleared organoids. *Nat Protoc* **14**, 1756–1771 (2019).
37. Semrau, S. *et al.* FuseFISH: robust detection of transcribed gene fusions in single cells. *Cell Reports* **6**, 18–23 (2014).
38. Stoeckius, M. *et al.* Simultaneous epitope and transcriptome measurement in single cells. *Nature Methods* **14**, 865–868 (2017).
39. Lun, A. T. L., Bach, K. & Marioni, J. C. Pooling across cells to normalize single-cell RNA sequencing data with many zero counts. *Genome Biol.* **17**, 75–14 (2016).

40. Haghverdi, L., Lun, A. T. L., Morgan, M. D. & Marioni, J. C. Batch effects in single-cell RNA-sequencing data are corrected by matching mutual nearest neighbors. *Nature Biotechnology* **36**, 421–427 (2018).
41. McInnes, L., Healy, J. & Melville, J. UMAP: Uniform Manifold Approximation and Projection for Dimension Reduction. (2018).
42. Blondel, V. D., Guillaume, J.-L., Lambiotte, R. & Lefebvre, E. Fast unfolding of communities in large networks. (2008). doi:10.1088/1742-5468/2008/10/P10008
43. Scialdone, A. *et al.* Computational assignment of cell-cycle stage from single-cell transcriptome data. *Methods* **85**, 54–61 (2015).
44. van den Brink, S. C. *et al.* Single-cell sequencing reveals dissociation-induced gene expression in tissue subpopulations. *Nature Methods* **14**, 935–936 (2017).
45. Delile, J. *et al.* Single cell transcriptomics reveals spatial and temporal dynamics of gene expression in the developing mouse spinal cord. *Development* **146**, dev.173807 (2019).
46. Robinson, M. D., McCarthy, D. J. & Smyth, G. K. edgeR: a Bioconductor package for differential expression analysis of digital gene expression data. *Bioinformatics* **26**, 139–140 (2010).
47. Schneider, C. A., Rasband, W. S. & Eliceiri, K. W. NIH Image to ImageJ: 25 years of image analysis. *Nature Methods* **9**, 671–675 (2012).
48. van der Walt, S. *et al.* scikit-image: image processing in Python. *PeerJ* **2**, e453 (2014).

## Acknowledgements

We are thankful to Alfonso Martinez Arias for insightful discussions and feedback on the manuscript. We acknowledge Anna-Katerina Hadjantonakis for helpful input at various stages of the project. N. B.-C., M. M., P. v.d. B., M. F. and S.S. were supported by the Netherlands Organisation for Scientific Research (NWO/OCW, [www.nwo.nl](http://www.nwo.nl)), as part of the Frontiers of

Nanoscience (NanoFront) program. E.A. acknowledges support by a Stichting voor Fundamenteel Onderzoek der Materie (FOM, [www.nwo.nl](http://www.nwo.nl)) projectruimte grant (16PR1040). M.H. acknowledges support by a Netherlands Organisation for Scientific Research (NWO/OCW, [www.nwo.nl](http://www.nwo.nl)) VIDI grant (016.Vidi.189.007). This work was carried out on the Dutch national e-infrastructure with the support of SURF Cooperative. The funders had no role in study design, data collection and analysis, decision to publish, or preparation of the manuscript.

### **Author contributions**

N.B.-C., E.A. and M.H. cultured gastruloids and neuruloids. N.B.-C., E.A. and M.H. performed signaling experiments and immunostaining and analyzed the resulting images, N.B.-C. prepared samples for single-cell RNA sequencing and interpreted the sequencing data, M.M. performed the computational analysis of the single-cell RNA sequencing data, P.v.d.B. contributed to the computational analysis of single-cell RNA sequencing data and carried out the smFISH measurements, M.F. supported all experiments and performed all cryosectioning, N.B.-C., M. M., E.A., P.v.d.B. and M.H. produced figures, N.B.-C., M. M., E.A., P.v.d.B., M.H. and M.F. contributed to the manuscript, T.I., S.T. and S.S. conceived the study and acquired funding. S.S. interpreted the data and wrote the manuscript. All authors discussed the results and commented on the manuscript at all stages.

### **Competing interest**

The authors declare no competing interests.

### **Supplementary data**

See SI\_Guide.doc

## Correspondence and requests for materials

Should be addressed to S.S., S.T., T.I., or M.H.

**Extended data Fig. 1 | Optimization and characterisation of neuruloids.** **a**, SOX2 (neural progenitors-like cells) and T (primitive streak-like cells) expression in gastruloids and neuruloids with different starting ratio of ES and XEN cells (z-projection of whole mount immunostaining). Scale bars 100  $\mu$ m. **b**, SOX2 and OCT4 expression (immunostaining) in sections of neuruloids at 96 h (left, scale bars 100  $\mu$ m) and cultured ESCs (right, scale bars 10  $\mu$ m). **a-b**, Cells nuclei were stained with DAPI.

**Extended data Fig. 2 | Single-cell RNA-seq resolves cell type diversity in neuruloids and gastruloids.** **a**, Upper, number of detected genes per cell in each replicate; the blue line indicates a quality control threshold for neuruloids from replicate 1 and the black line for the remaining datasets. Lower, total expression per cell for each dataset. **b**, Umap of cells in neuruloids and gastruloids, colored by replicate. **c**, Umap of cells in neuruloids and gastruloids, colored by Louvain clustering. The encircled clusters contain the spiked-in cells. **d**, Left, average G2M scores for each cell type. Right, umaps of cells in neuruloids and gastruloids colored by G2M score. **e**, Left, average standardized expression of stress-related genes in spike-in cells. Middle, expression of stress-related genes by cell type. Right, umaps of cells in neuruloids and gastruloids with expression of stress-related genes indicated by color. **f**, Umap of Pijuan-Sala et al. dataset with cell types indicated by color. **g**, MNN mapping of neuruloid cells from replicate 2 (bright colors) to the Pijuan-Sala et al. dataset (dim colors), as an example for the mapping procedure. **h**, Cell type frequencies for each replicate in neuruloids and gastruloids resulting from knn assignments based on the mapping in (g). **i**, Differences between relative frequencies of cell types in neuruloids and gastruloids.

**Extended data Fig. 3 | Expression of literature markers.** Heat map of standardized expression of genes associated with mouse embryonic development in neuruloids and gastruloids. References describing the *in vivo* expression of the genes are given in Supplementary Table 1.

**Extended data Fig. 4 | Neural tube-like cells exhibit dorsal characteristics.**

**a**, Expression of *Sox2*, *Pax6* and *Nkx6.1* in neuruloids, as measured by single-cell RNA-seq. **b**, Left, umap of the cells in the Delile et al. dataset colored by cell type. Right, MNN mapping of cells classified as “spinal cord” in replicate 2 neuruloids (bright colors) to the Delile et al. dataset (dim colors), as an example of the mapping procedure. **c**, Umap of cells in neuruloids with log expression of *Bmp2* and *Bmp4* indicated by color.

**Extended data Fig. 5 | Neuruloid derived cerebral cortex-like tissue expresses PAX6 and CD31.** Immunostaining in sections of cerebral cortex-like tissue differentiated from neuruloids at 8 days after cell seeding. **a**, TUJ1, SOX2 (top) and PAX6 (bottom). The dashed box highlights layered, cortex-like organization adjacent to a ventricle-like cavity. **b**, TUJ1, SOX2 and CD31. Zoom-ins show clusters of CD31-positive cells. **a**, **b** Cells nuclei were stained with DAPI. Scale bars 100 $\mu$ m.

**Extended data Fig. 6 | XEN-derived cells are visceral endoderm-like in neuruloids.**

**a**, **b**, Umaphs of the Pijuan-Sala or Nowotschin dataset, respectively. XEN spike-ins and XEN-derived cells from neuruloids replicate 2 (bright colors) are mapped to the *in vivo* datasets (dim colors). Framed cell types correspond to the ones on which XEN cells mapped. **c**, Cell type frequencies of XEN spike-ins and XEN derived cells in neuruloids, resulting from knn



assignments based on the mapping in **(b)**. **d**, *Dab2*, *Fst* and *Hhex* expression visualized by single molecule fluorescence *in situ* hybridization (smFISH). Cell nuclei were stained with DAPI. Each diffraction limited dot is a single mRNA molecule. Left, section of a neuruloid at 96 h. Scale bar 50  $\mu\text{m}$ . Right, XEN cells cultured under standard maintenance conditions (top) and XEN cells treated with CHIR according to the neuruloid protocol (bottom). Scale bars 20  $\mu\text{m}$ .

### **Extended data Fig. 7 | XEN cells induce stratified epithelium and lumen formation**

**a**, Left, umap of cells in neuruloids with XEN-derived cells colored by cell type (gut, parietal endoderm (parietal end.), embryonic VE (visceral end.) or extraembryonic VE (ExE end.)). Mid-right, umap of cells in neuruloids colored by log expression of Fibronectin (*Fn*), Laminin alpha 1 (*Lama1*) and Laminin beta 1 (*Lamb1*). A violin plot of log expression in XEN-derived cell types is shown below the umap for each gene. **b**, SOX2 and GATA6 immunostaining in sections of gastruloids grown in Geltrex at 96 h. **c**, SOX2 immunostaining in sections of neuruloids grown without CHIR. No specific T staining could be detected (data not shown). XEN cells were localized by expression of GATA6. **b**, **c**, Cell nuclei were stained with DAPI. Scale bars 50  $\mu\text{m}$ .

### **Extended Data Table 1 | Genes differentially expressed between spinal cord-like cells and the other cells types in neuruloids.**

### **Extended Data Table 2 | Genes differentially expressed between spinal cord-like cells in neuruloids and gastruloids.**

**Extended data Table 3 | Genes differentially expressed between XEN-derived cells in neuruloids and cultured XEN cells.**

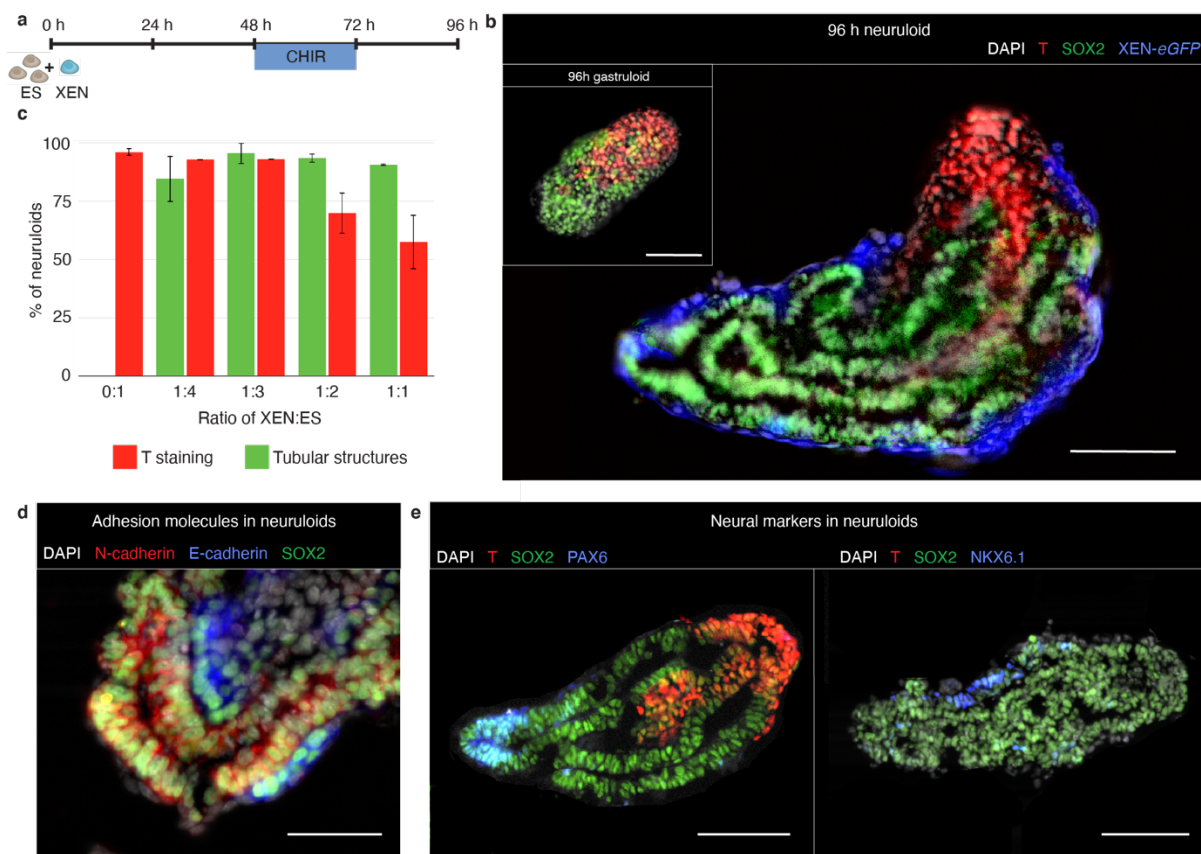

**Fig. 1 | XEN cells induce neural tube-like structures in gastruloids.** **a**, Schematic of the culture protocol: at 0 h, 200 cells (150 ESCs and 50 XEN cells) were aggregated; CHIR was added between 48 h and 72 h after cell seeding; cell aggregates were cultured until 96 h. **b**, T and SOX2 expression in aggregates at 96 h (z-projection of whole mount immunostaining). Inset: aggregate resulting from the standard gastruloid protocol (without XEN cells). Scale bars 100  $\mu$ m. **c**, Average fraction of aggregates showing tubular structures and T staining at 96 h for different starting ratios of ESCs and XEN cells (n=2 experiments, error bars show standard deviation). **d**, SOX2, E-cadherin and N-cadherin immunostaining in sections of 96 h aggregates. Scale bar 50  $\mu$ m. **e**, T, SOX2, PAX6 and NKX6.1 immunostaining in 96 h aggregates. Scale bars 100  $\mu$ m. **b**, **d-e**, Cells nuclei were stained with DAPI.

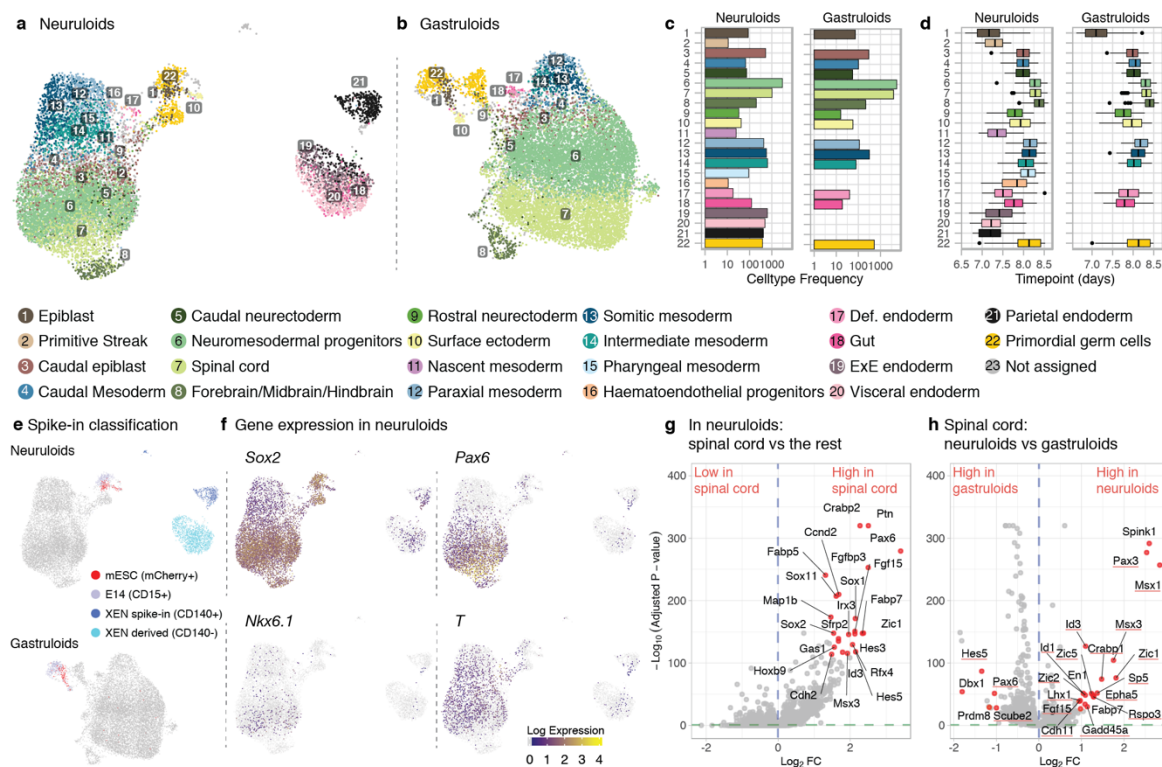

**Fig. 2 | Single-cell RNA-sequencing reveals expression differences between neuruloids and gastruloids.** **a,b**, Umap of cells in neuruloids and gastruloids (2 replicates each) colored by cell type based on mapping to *in vivo* data<sup>15</sup>. **c**, Cell type frequencies in neuruloids and gastruloids. **d**, Developmental age of cell types based on mapping to *in vivo* data. **e**, Umap of cells in neuruloids and gastruloids with spike-in cells and XEN derived cells highlighted by color. **f**, *Sox2*, *Pax6*, *Nkx6.1* and *T* log-expression levels indicated by color in umaps of neuruloids. **g**, Gene expression differences between cells classified as spinal cord and all other cells in neuruloids (fold-change vs p-value). Named genes are expressed in the neural tubes according to previous studies (Extended Data Table 1). **h**, Gene expression differences between cells classified as spinal cord in gastruloids and neuruloids (fold-change vs p-value). Underlined genes are expressed in the dorsal part of the neural tube according to previous studies (Extended Data Table 2).

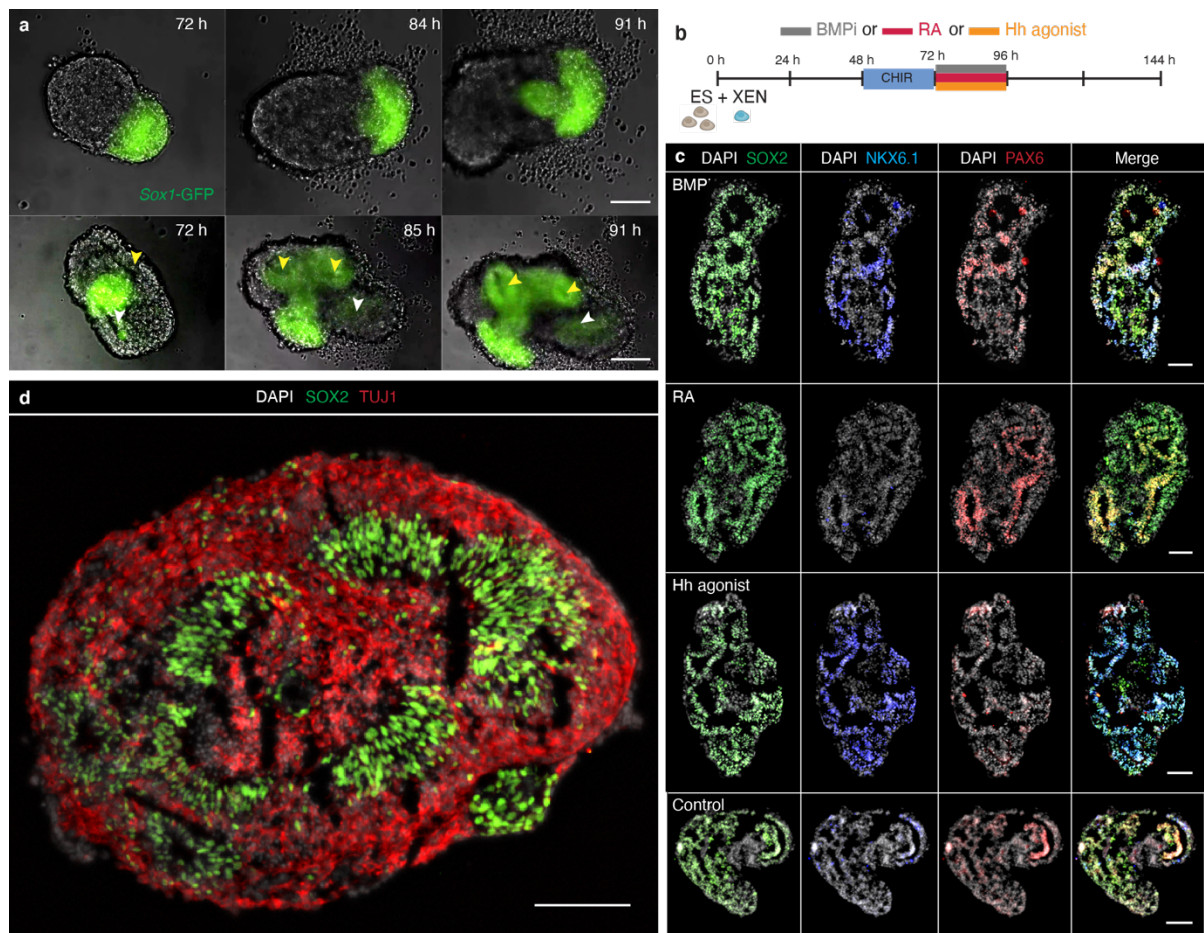

**Fig. 3 | Tubular structures show developmental potential resembling neural tubes *in vivo*.**

**a**, Live cell imaging of SOX1 expression in gastruloids (top panel) and neuruloids (lower panel) grown with *Sox1*-GFP mESCs (see Supplementary Videos 1-6). The arrows indicate the formation of two SOX1 positive tubes between 72 h and 91 h (tube 1: white arrows, tube 2: yellow arrows). Scale bars 10  $\mu$ m. **b**, Schematic of the signaling experiments. Neuruloids were treated from 72 h to 96 h, with either BMP pathway inhibitor (BMPi), retinoic acid (RA) or hedgehog pathway agonist (Hh agonist). The neuruloids were then allowed to grow for an additional 48 h before staining. **c**, SOX2, NKX6.1 and PAX6 immunostaining in sections of neuruloids at 144 h, treated with the indicated factors. N = 3 experiments. Scale bars 100  $\mu$ m. **d**, SOX2 and TUJ1 immunostaining in a section of neuruloid-derived cerebral cortex-like tissue, 8 days after cell seeding (differentiated from neuruloids for 4 days). Scale bar 100  $\mu$ m. **c-d**, Cell nuclei are stained with DAPI.

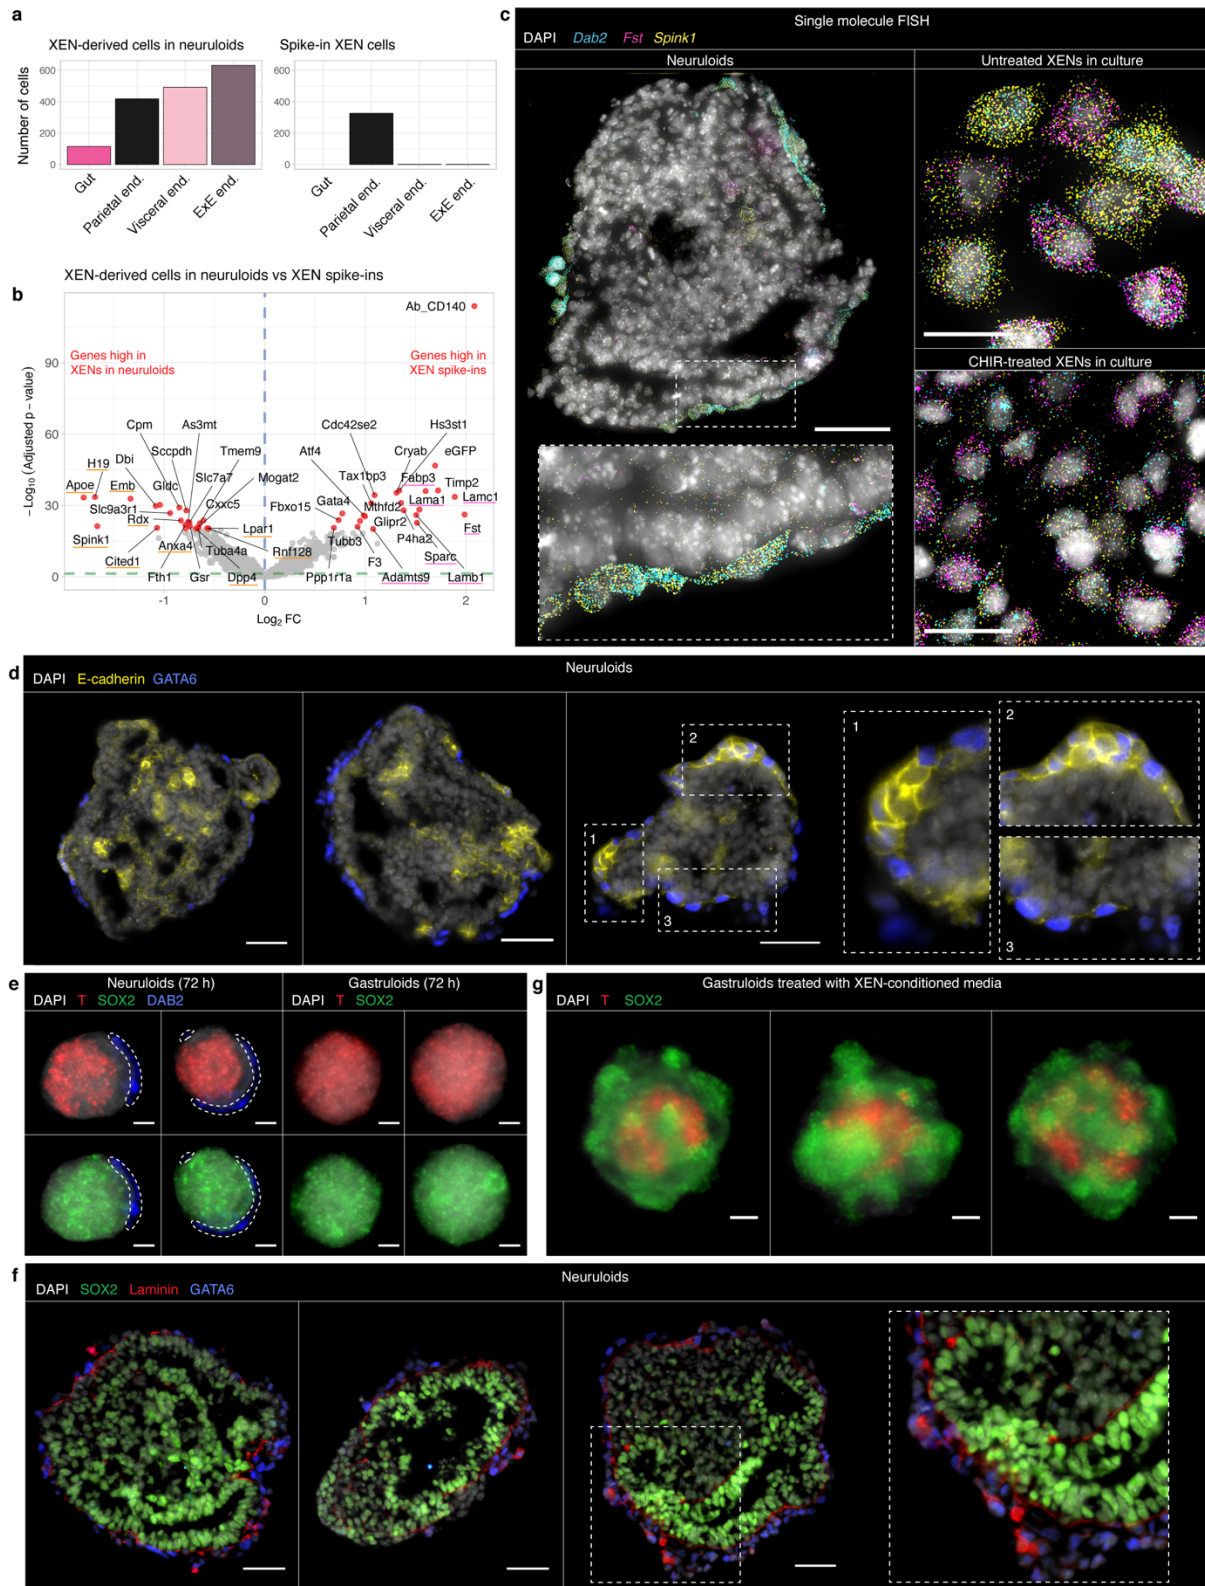

**Fig. 4 | XEN cells guide symmetry breaking by locally inhibiting primitive streak formation.** **a**, Left, cell types of XEN-derived cells in neuruloids. Cells were classified as gut, parietal endoderm (parietal end.), embryonic VE (visceral end.) or extraembryonic VE (ExE end.). Right, cell types of spiked-in XEN cells. **b**, Gene expression differences between XEN spike-ins and XEN-derived cells in neuruloids (fold-change vs p-value). Orange and pink lines indicate genes with PE-like and VE-like identity, respectively (see Extended Data Table 3). **c**, *Dab2*, *Spink1* and *Fst* expression visualized by single molecule fluorescence *in situ* hybridization (smFISH). Cell nuclei were stained with DAPI. Each diffraction limited dot is a single mRNA molecule. Left, section of a neuruloid at 96 h. Scale bar 50  $\mu$ m. Right, XEN cells cultured under standard maintenance conditions (top) and XEN cells treated with CHIR according to the neuruloid protocol (bottom). Scale bars 20  $\mu$ m. **d**, E-cadherin immunostaining in sections of neuruloids at 96 h. XEN cells were localized by expression of GATA6. Zoom-ins are outlined by dashed boxes 1-3 and shown on the right. **e**, T and SOX2 expression in neuruloids (left) and gastruloids (right) at 72 h (z-projection of whole mount immunostaining). XEN cells were localized by expression of DAB2 and are indicated by a dashed outline. **f**, SOX2 and laminin immunostaining in sections of neuruloids at 96 h. XEN cells were localized by expression of GATA6. A zoom-in is outlined by a dashed box and shown on the right. **g**, T and SOX2 expression in gastruloids grown in XEN-conditioned media at 96 h (z-projection of whole mount immunostaining). **d-g**, Cell nuclei were stained with DAPI. Scale bars 50  $\mu$ m.

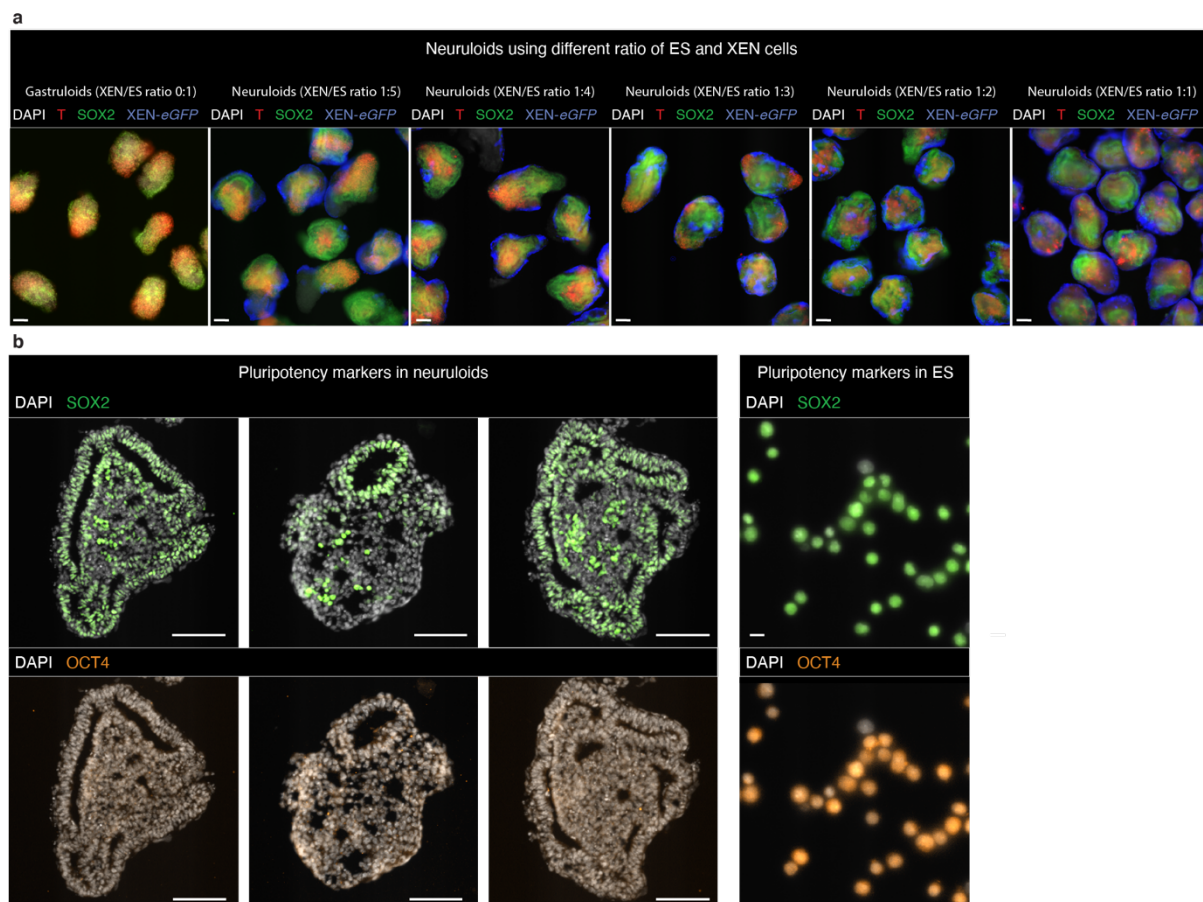

**Extended data Fig. 1 | Optimization and characterisation of neuruloids.** **a**, SOX2 (neural progenitors-like cells) and T (primitive streak-like cells) expression in gastruloids and neuruloids with different starting ratio of ES and XEN cells (z-projection of whole mount immunostaining). Scale bars 100  $\mu$ m. **b**, SOX2 and OCT4 expression (immunostaining) in sections of neuruloids at 96 h (left, scale bars 100  $\mu$ m) and cultured ESCs (right, scale bars 10  $\mu$ m). **a-b**, Cells nuclei were stained with DAPI.



**a** Cell coverage for each data set

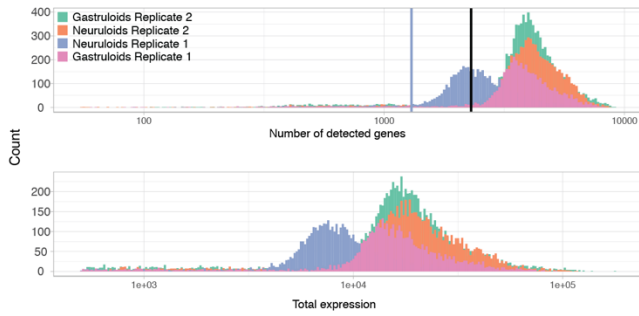

**b** Neuroblasts

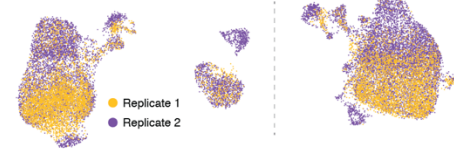

**c** Neuroblasts

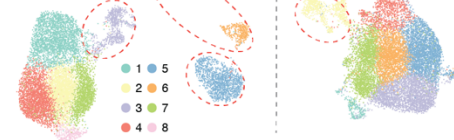

**d** Cell cycle analysis

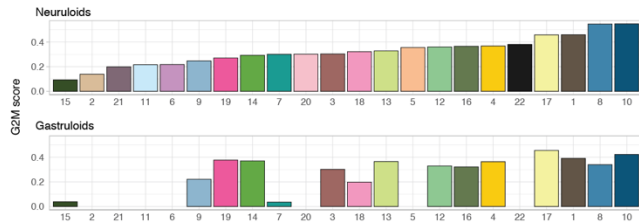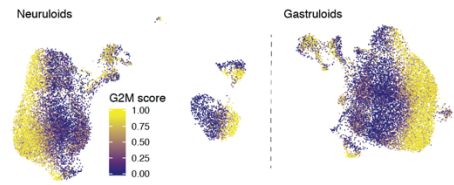

**e** Average standardized expression of stress-related genes

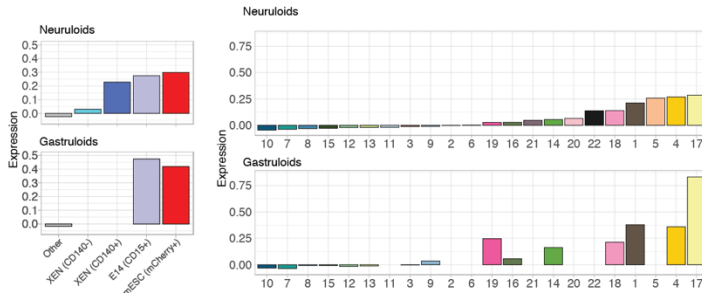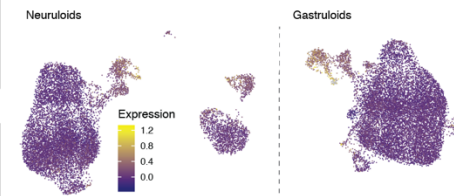

**f**

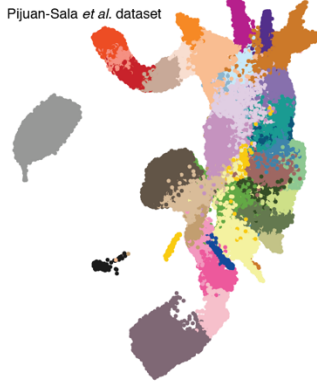

**g**

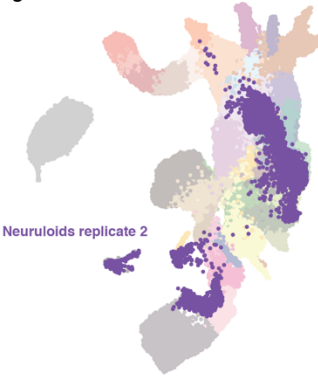

**h**

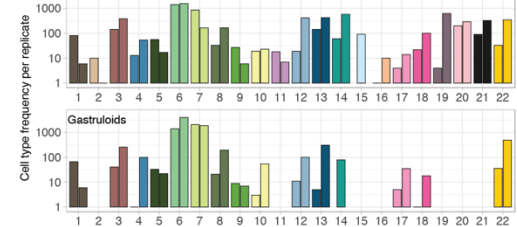

**i**

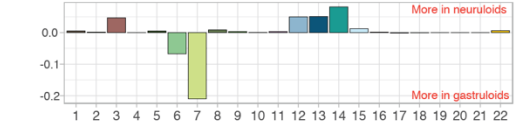

- |                        |                                |                          |                                   |                      |                        |                        |                              |
|------------------------|--------------------------------|--------------------------|-----------------------------------|----------------------|------------------------|------------------------|------------------------------|
| 1 Epiblast             | 6 NMP                          | 11 Nascent mesoderm      | 16 Haematoendothelial progenitors | 21 Parietal endoderm | 26 Blood progenitors 2 | 31 Blood progenitors 1 | 36 Anterior Primitive Streak |
| 2 Primitive Streak     | 7 Spinal cord                  | 12 Paraxial mesoderm     | 17 Def. endoderm                  | 22 PGC               | 27 Endothelium         | 32 Erythroid1          | 37 Mixed mesoderm            |
| 3 Caudal epiblast      | 8 Forebrain/Midbrain/Hindbrain | 13 Somitic mesoderm      | 18 Gut                            | 23 Neural crest      | 28 Cardiac myocytes    | 33 Erythroid2          |                              |
| 4 Caudal Mesoderm      | 9 Rostral neuroectoderm        | 14 Intermediate mesoderm | 19 ExE endoderm                   | 24 Allantois         | 29 Mesenchyme          | 34 Notochord           |                              |
| 5 Caudal neuroectoderm | 10 Surface ectoderm            | 15 Pharyngeal mesoderm   | 20 Visceral endoderm              | 25 Erythroid3        | 30 ExE mesoderm        | 35 ExE ectoderm        |                              |

**Extended data Fig. 2 | Single-cell RNA-seq resolves cell type diversity in neuruloids and gastruloids.** **a**, Upper, number of detected genes per cell in each replicate; the blue line indicates a quality control threshold for neuruloids from replicate 1 and the black line for the remaining datasets. Lower, total expression per cell for each dataset. **b**, Umap of cells in neuruloids and gastruloids, colored by replicate. **c**, Umap of cells in neuruloids and gastruloids, colored by Louvain clustering. The encircled clusters contain the spiked-in cells. **d**, Left, average G2M scores for each cell type. Right, umaps of cells in neuruloids and gastruloids colored by G2M score. **e**, Left, average standardized expression of stress-related genes in spike-in cells. Middle, expression of stress-related genes by cell type. Right, umaps of cells in neuruloids and gastruloids with expression of stress-related genes indicated by color. **f**, Umap of Pijuan-Sala et al. dataset with cell types indicated by color. **g**, MNN mapping of neuruloid cells from replicate 2 (bright colors) to the Pijuan-Sala et al. dataset (dim colors), as an example for the mapping procedure. **h**, Cell type frequencies for each replicate in neuruloids and gastruloids resulting from knn assignments based on the mapping in (g). **i**, Differences between relative frequencies of cell types in neuruloids and gastruloids.

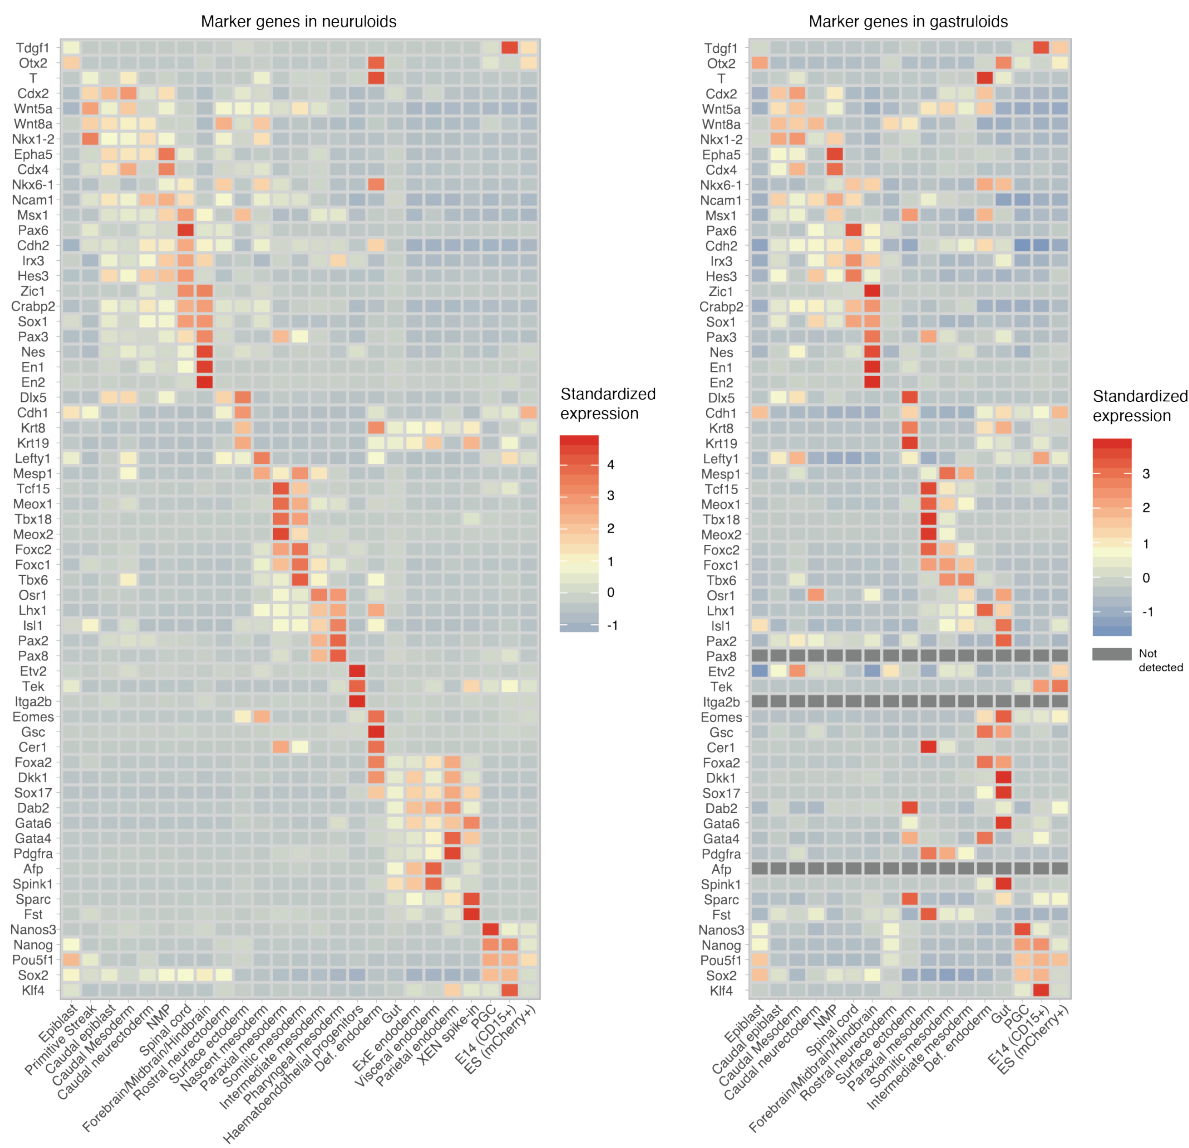

**Extended data Fig. 3 | Expression of literature markers.** Heat map of standardized expression of genes associated with mouse embryonic development in neuruloids and gastruloids. References describing the *in vivo* expression of the genes are given in Supplementary Table 1.

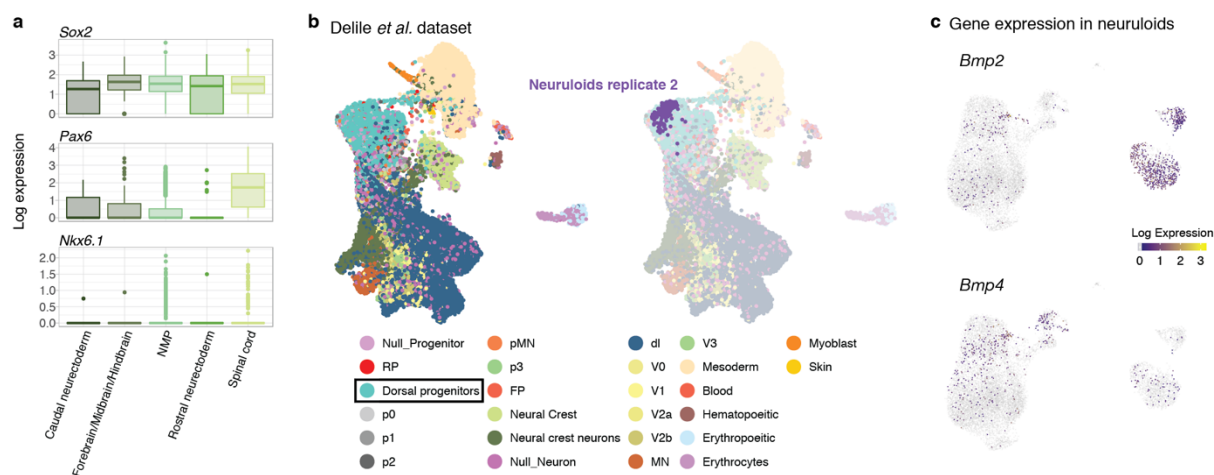

### Extended data Fig. 4 | Neural tube-like cells exhibit dorsal characteristics.

**a**, Expression of *Sox2*, *Pax6* and *Nkx6.1* in neuruloids, as measured by single-cell RNA-seq.

**b**, Left, umap of the cells in the Delile et al. dataset colored by cell type. Right, MNN mapping of cells classified as "spinal cord" in replicate 2 neuruloids (bright colors) to the Delile et al. dataset (dim colors), as an example of the mapping procedure.

**c**, Umap of cells in neuruloids with log expression of *Bmp2* and *Bmp4* indicated by color.

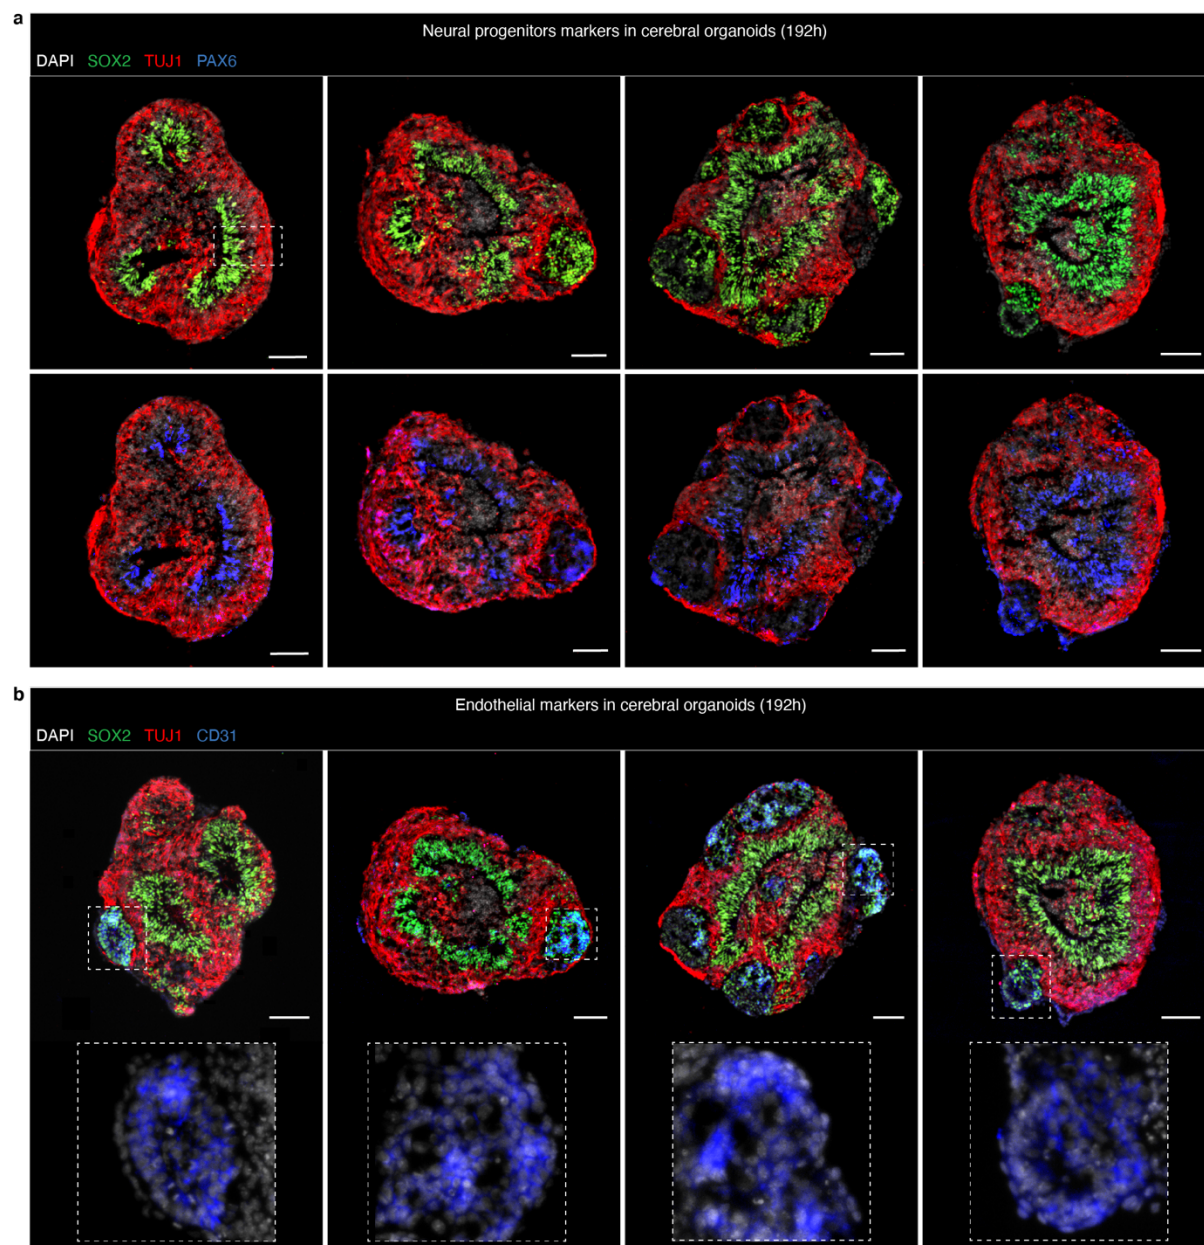

**Extended data Fig. 5 | Neuruloid derived cerebral cortex-like tissue expresses PAX6 and CD31.** Immunostaining in sections of cerebral cortex-like tissue differentiated from neuruloids at 8 days after cell seeding. **a**, TUJ1, SOX2 (top) and PAX6 (bottom). The dashed box highlights layered, cortex-like organization adjacent to a ventricle-like cavity. **b**, TUJ1, SOX2 and CD31. Zoom-ins show clusters of CD31-positive cells. **a, b** Cells nuclei were stained with DAPI. Scale bars 100 $\mu$ m.

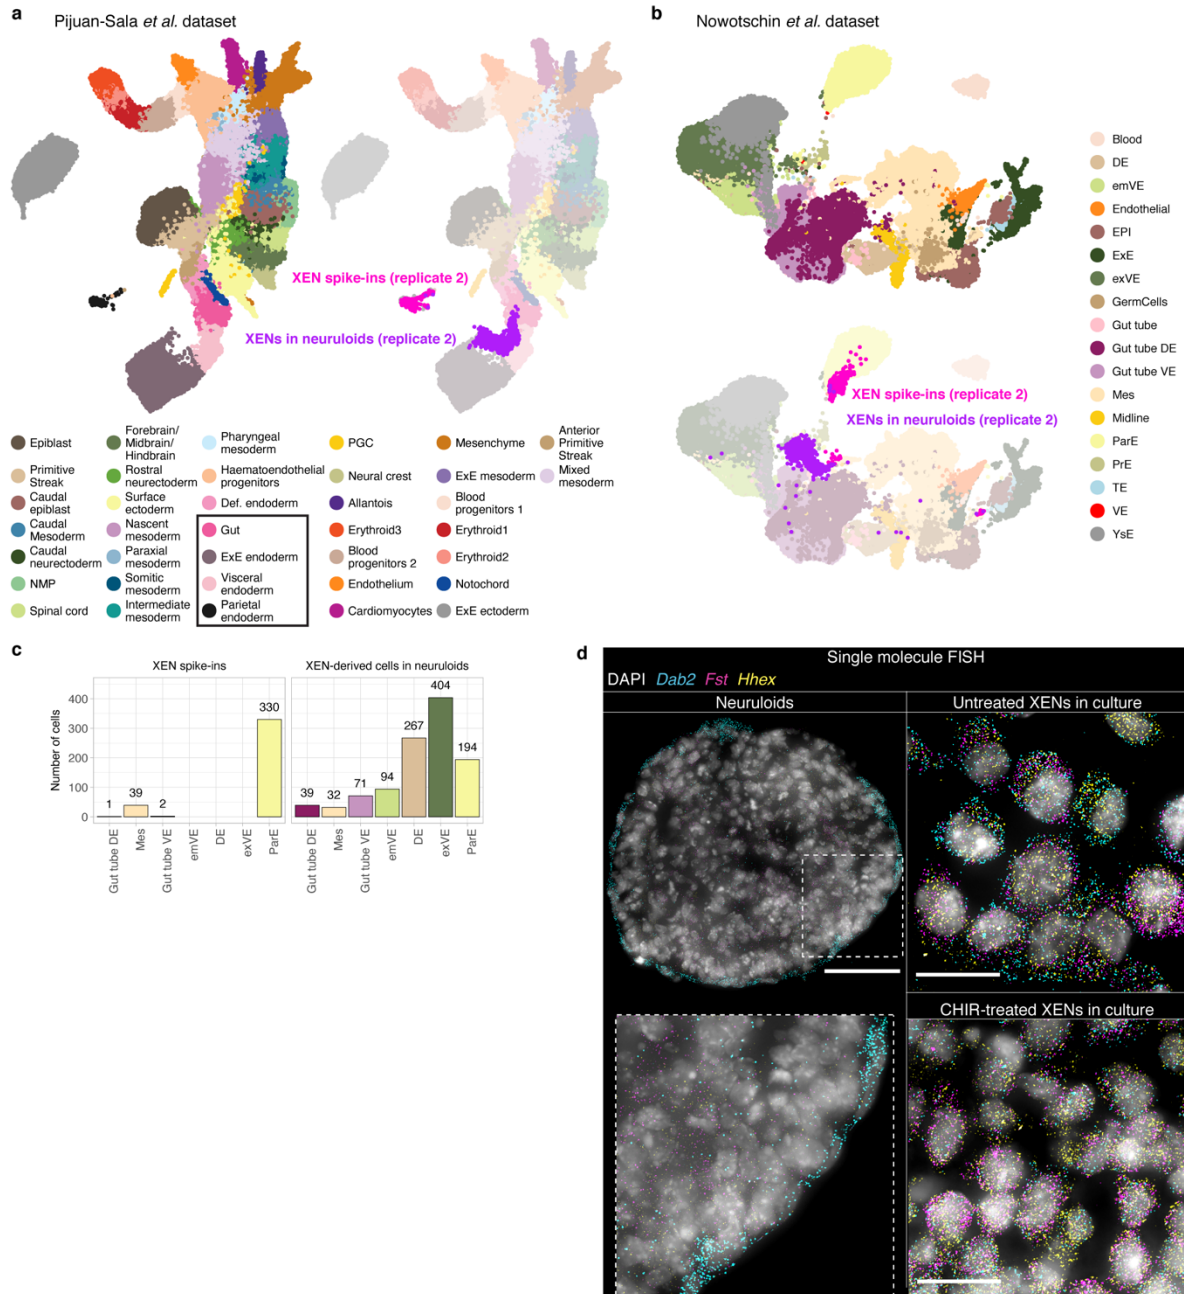

**Extended data Fig. 6 | XEN-derived cells are visceral endoderm-like in neuruloids.**

**a, b**, Umaps of the Pijuan-Sala or Nowotschin dataset, respectively. XEN spike-ins and XEN-derived cells from neuruloids replicate 2 (bright colors) are mapped to the *in vivo* datasets (dim colors). Framed cell types correspond to the ones on which the XEN cells mapped. **c**, Cell type frequencies of XEN spike-ins and XEN derived cells in neuruloids, resulting from knn assignments based on the mapping in **(b)**. **d**, *Dab2*, *Fst* and *Hhex* expression visualized by single molecule fluorescence *in situ* hybridization (smFISH). Cell nuclei were stained with DAPI. Each diffraction limited dot is a single mRNA molecule. Left, section of a neuruloid at 96 h. Scale bar 50  $\mu\text{m}$ . Right, XEN cells cultured under standard maintenance conditions (top) and XEN cells treated with CHIR according to the neuruloid protocol (bottom). Scale bars 20  $\mu\text{m}$ .

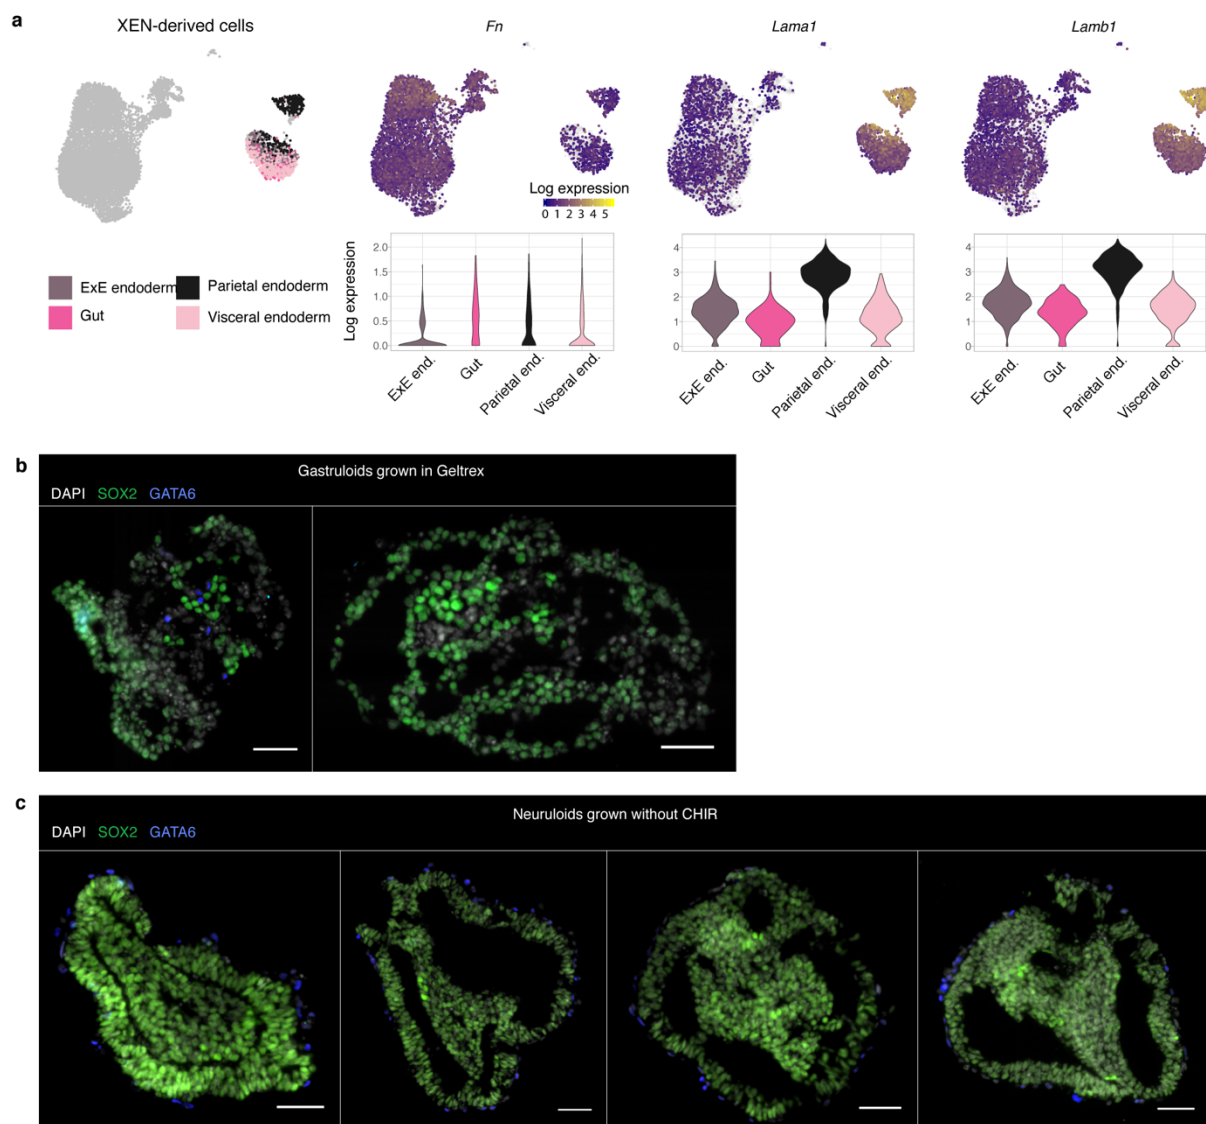

### Extended data Fig. 7 | XEN cells induce stratified epithelium and lumen formation

**a**, Left, umap of cells in neuruloids with XEN-derived cells colored by cell type (gut, parietal endoderm (parietal end.), embryonic VE (visceral end.) or extraembryonic VE (ExE end.)). Mid-right, umap of cells in neuruloids colored by log expression of Fibronectin (*Fn*), Laminin alpha 1 (*Lama1*) and Laminin beta 1 (*Lamb1*). A violin plot of log expression in XEN-derived cell types is shown below the umap for each gene. **b**, SOX2 and GATA6 immunostaining in sections of gastruloids grown in Geltrex at 96 h. **c**, SOX2 immunostaining in sections of neuruloids grown without CHIR. No specific T staining could be detected (data not shown). XEN cells were localized by expression of GATA6. **b**, **c**, Cell nuclei were stained with DAPI. Scale bars 50  $\mu$ m.



## Extended Data Table 1 | Genes differentially expressed between spinal cord-like cells and the other cells types in neuruloids.

| Gene         | Log FC      | p.adjust  | Reference                                                                         |
|--------------|-------------|-----------|-----------------------------------------------------------------------------------|
| Ccnd2        | 1.684190185 | 1.37E-210 | Lacomme, M., et al., (2012). <i>Molecular and Cellular Biology</i>                |
| Crabp2       | 2.27328271  | 0         | Ruberte, E., et al., (1992). <i>Development</i>                                   |
| Id3          | 1.789970808 | 5.65E-118 | Wine-Lee, L., et al., (2004). <i>Development</i>                                  |
| Fabp7 (BLBP) | 2.339513279 | 2.65E-148 | Feng, L., Hatten, M. E., & Heintz, N. (1994). <i>Neuron</i>                       |
| Rfx4         | 2.066843727 | 3.40E-130 | Ashique, A. M., et al. (2009). <i>Science Signaling</i>                           |
| Hoxb9        | 1.561341789 | 4.07E-126 | Graham, A., Maden, M., & Krumlauf, R. (1991). <i>Development</i>                  |
| Cdh2         | 1.486458795 | 1.15E-114 | Radice, G. L., et al., (1997). <i>Developmental Biology</i>                       |
| Msx3         | 1.925035016 | 3.06E-116 | Misra, K., Luo, H., Li, S., Matise, M., & Xiang, M. (2014). <i>Development</i>    |
| Pax6         | 3.403368474 | 4.04E-280 | Jeong, J., & McMahon, A. P. (2005). <i>Development</i>                            |
| Fabp5        | 1.316127675 | 1.97E-241 | Shimamoto, C., et al. (2014). <i>Human Molecular Genetics</i>                     |
| Sfrp2        | 1.677002264 | 9.74E-140 | Misra, K., & Matise, M. P. (2010). <i>Developmental Biology</i>                   |
| Hes3         | 2.132129411 | 2.12E-147 | Lobe, C. G. (1997). <i>Mechanisms of Development</i>                              |
| Ptn          | 2.50622717  | 0         | Magdaleno, S., et al. (2006). <i>PLoS Biology</i>                                 |
| Fgf15        | 2.131102328 | 2.17E-151 | McWhirter, J. R., et al., (1997). <i>Development</i>                              |
| Irx3         | 1.957663655 | 1.71E-146 | Lebel, M., et al. (2003). <i>Molecular and Cellular Biology</i>                   |
| Zic1         | 2.371434543 | 1.56E-148 | Nagai, T., et al., (1997). <i>Developmental Biology</i>                           |
| Fgfbp3       | 2.502793725 | 1.10E-253 | Yu, K., McGlynn, S., & Matise, M. P. (2013). <i>Development</i>                   |
| Hes5         | 2.152139781 | 9.35E-119 | Hatakeyama, J., et al., (2004). <i>Development</i>                                |
| Map1b        | 1.46443751  | 3.03E-174 | Fawcett, J. W., et al., (1994). <i>Neuroscience</i>                               |
| Gas1         | 1.676359071 | 1.03E-135 | Allen, B. L., Tenzen, T., & McMahon, A. P. (2007). <i>Genes &amp; Development</i> |
| Sox11        | 1.610646468 | 6.85E-208 | Tanaka, S., et al., (2004). <i>Molecular and Cellular Biology</i>                 |
| Sox2         | 1.54213575  | 1.78E-148 | Hoffmann, S. A., et al., (2014). <i>Development</i>                               |
| Sox1         | 2.143957789 | 5.90E-172 | Hoffmann, S. A., et al., (2014). <i>Development</i>                               |

## Extended Data Table 2 | Genes differentially expressed between spinal cord-like cells in neuruloids and gastruloids.

| Gene                | Log FC | Expression summary                                                      | BMP signalling response                               | Reference                                                                 |
|---------------------|--------|-------------------------------------------------------------------------|-------------------------------------------------------|---------------------------------------------------------------------------|
| <i>Msx1</i>         | 2.84   | Dorsal neural tube<br>+ small ventral domain                            | BMP (Lee, K. J., & Jessell, T. M. (1999))             | Misra, K., et al., (2014).<br>Duval, N., et al. (2014).                   |
| <i>Spink1</i>       | 2.59   |                                                                         |                                                       |                                                                           |
| <i>Pax3</i>         | 2.53   | Dorsal neural tube                                                      | BMP (Lee, K. J., & Jessell, T. M. (1999))             | Kriks. S., et al., (2005).                                                |
| <i>Zic1</i>         | 1.81   | Dorsal neural tube                                                      | BMP (Lee, K. J., & Jessell, T. M. (1999))             | Nagai, T., et al., (1997).<br>Aruga, J., et al., (2002).                  |
| <i>Msx3</i>         | 1.75   | Dorsal neural tube                                                      | BMP4 (Shimeld, S. et al., (1996))                     | Misra, K., et al., (2014).<br>Duval, N., et al. (2014).                   |
| <i>Crabp1</i>       | 1.47   | Forebrain, Neural crest + dorsal neural tube                            | -                                                     | Ruberte, E., et al., (1991).                                              |
| <i>Sp5</i>          | 1.37   | Midbrain and dorsal neural tube                                         | -                                                     | Andoniadou, C. L., et al. (2011).<br>Dunty, W. C., et al., (2014).        |
| <i>Epha5</i>        | 1.29   | Dorsal and ventral                                                      | BMP2 (Yamada, T., et al., (2016))                     | Abdul-Aziz, N. M., et al., (2009).<br>Ono, K., et al. (2014).             |
| <i>Rspo3</i>        | 1.28   | Forebrain, dorsal neural tube                                           | -                                                     | Nam, J.-S., et al., (2007).                                               |
| <i>En1</i>          | 1.27   | Hinbrain/Midbrain<br>Ventral neural tube                                | Not affected by BMP (Timmer, J. R., et al., (2002))   | Ericson, J., et al. (1997).<br>Sgaier, S. K., et al., (2007).             |
| <i>Zic5</i>         | 1.23   | Dorsal neural tube and head fold                                        | BMP (Nakata, K., et a., (2000))                       | Inoue, T., et al., (2004).                                                |
| <i>Fabp7 (BLBP)</i> | 1.14   | Ventral neural tube<br>Midbrain                                         | -                                                     | Deille, J., et al., (2019).<br>Feng, L., et al., (1994).                  |
| <i>Id3</i>          | 1.10   | The roof plate and dorsal neural ectoderm<br>+ small ventral domain     | BMP (Wine-Lee, L., et al., (2004))                    | Wine-Lee, L., et al., (2004).                                             |
| <i>Zic2</i>         | 1.09   | Dorsal neural tube                                                      | BMP6/7 (Lee, K. J., & Jessell, T. M. (1999))          | Ybot-Gonzalez, P., et al., (2007).<br>Sanchez-Ferras, O., et al., (2014). |
| <i>Gadd45a</i>      | 1.08   | Mostly dorsal neural tube<br>Residual expression in ventral neural tube | BMP2 (Ijiri, K., et al. (2005))                       | Kaufmann, L. T., et al., (2011).                                          |
| <i>Id1</i>          | 1.04   | Roof plate and dorsal neural ectoderm<br>+ small ventral domain         | BMP (Wine-Lee, L., et al., (2004))                    | Wine-Lee, L., et al., (2004).                                             |
| <i>Cdh11</i>        | 0.98   | Neural crest + dorsal neural tube                                       | BMP7 (Awazu, M., et al., (2017))                      | Tondeleir, D., et al., (2014).<br>Kashef, J., et al., (2009).             |
| <i>Lhx1</i>         | 0.97   | Dorsal interneurons                                                     | Not affected by BMP4/7 (Le Dréau, G., et al., (2012)) | Le Dréau, G., et al., (2012).                                             |
| <i>Fgf15</i>        | 0.95   | Dorsal regions of the di-, mes and metencephalon                        | -                                                     | McWhirter, J. R., et al., (1997).<br>Fischer, T., et al., (2011).         |

## Extended data Table 3 | Genes differentially expressed between XEN-derived cells in neuruloids and cultured XEN cells.

| Gene           | Log FC | Expression summary | Reference                                                       |
|----------------|--------|--------------------|-----------------------------------------------------------------|
| ApoE           | -1.80  | VE > PE            | Basheeruddin, K., et al., (1987)                                |
| H19            | -1.69  | VE > PE            | Long, L., & Spear, B. T. (2004).                                |
| Spink1         | -1.66  | VE                 | Goh, H. N., et al. (2014).                                      |
| Emb            | -1.33  | pan-endoderm       | Brown, K., et al., (2010).                                      |
| Cited1 (Mgs1)  | -1.07  | exVE               | Dunwoodie, S. L., et al., (1998).                               |
| Rdx (Radixin)  | -0.83  | VE                 | Igarashi, H., et al. (2018). McClatchey, A. I., et al., (1997). |
| Anxa4          | -0.78  | pan-endoderm       | Brown, K., et al., (2010).                                      |
| Dpp4           | -0.68  | VE                 | Sherwood, R. I., et al. (2007).                                 |
| Laprl (Lpa1)   | -0.57  | VE                 | Kolke, S., et al., (2009).                                      |
| Rnf128 (Greul) | -0.56  | VE                 | Borchers, A. G. M., et al., (2002).                             |
| Gata4          | 0.77   | pan-endoderm       | Morrissey, E. E., et al., (1998).                               |
| P4ha2          | 0.79   | PrE                | Ohnishi, Y., et al. (2014).                                     |
| Adamts9        | 1.08   | PE                 | Jungers, K. A., et al., (2005).                                 |
| Lamb1          | 1.51   | PE                 | Miner, J. H., et al., (2004).                                   |
| Sparc          | 1.51   | PE                 | Mason, I. J., et al., (1986).                                   |
| Lama1          | 1.54   | PE                 | Hogan, B. L., et al., (1980).                                   |
| Fabp3          | 1.60   | exVE - PE          | Cheng, S., et al. (2019). Futaki, S., et al. (2003).            |
| Lamc1          | 1.89   | PE                 | Smyth, N., et al., (1999).                                      |
| Fst            | 1.99   | PE                 | Feijen, A., et al. (1994).                                      |
